# Supplementary material for: New Insights into the Phylogeny and Molecular Classification of Nicotinamide Mononucleotide Deamidases
Source: PubMed Central journal article supplement (PMC3855486; doi:10.1371/journal.pone.0082705), 2013-12-05

Lineage 1.1

Table of amino acid sequences for Lineage 1.1, domains M-I and M-II. Includes gene names (CINAL\_GGEUR, AKKM8, COLP3, GEMAT, SALRD, BACFN, CYTH3, CHLCH, CHLPB, SORC5, MYXXD, PELCD, SYNFM, DESAH, DESOH, GEOSF, GEOMG, SHEAM, SHEDO, FERNB, THEM4, THEM4, THEM4, THENN, LEPBJ, LEPIN, GRAFK, FLA1J, FLAPJ) and domain labels (beta1, alpha1, alpha2, beta2, alpha3).

Table of amino acid sequences for Lineage 1.1, domains M-III and M-IV. Includes gene names and domain labels (beta3, alpha4, beta4, alpha5, alpha6, beta5).

Table of amino acid sequences for Lineage 1.1, domains M-V, M-VI, M-VII, M-VIII, and M-IX. Includes gene names and domain labels (alpha8, alpha9, alpha10, alpha11, alpha12).

Table of amino acid sequences for Lineage 1.1, domains P-I, P-II, P-III, P-IV, P-V, P-VI, P-VII, P-VIII, and P-IX. Includes gene names and domain labels (alpha13, alpha14, alpha15).

Table of amino acid sequences for Lineage 1.1, domains P-X and P-XI. Includes gene names and domain labels (alpha16, alpha17).

Lineage 1.2

CINA\_OCEIH alignment for regions alpha1, alpha2, and alpha3. Residues are numbered from 1 to 60. Conserved residues are highlighted in red.

M-I and M-II motifs. M-I covers residues 70-90, and M-II covers residues 100-130. Residues are numbered from 70 to 130. Conserved residues are highlighted in red.

M-III and M-IV motifs. M-III covers residues 140-150, and M-IV covers residues 160-200. Residues are numbered from 140 to 200. Conserved residues are highlighted in red.

M-V, M-VI, M-VII, and i-I motifs. M-V covers residues 210-220, M-VI covers 230-240, M-VII covers 250-260, and i-I covers 270-280. Residues are numbered from 210 to 280. Conserved residues are highlighted in red.

i-II motif. Covers residues 290-330. Residues are numbered from 290 to 330. Conserved residues are highlighted in red.

P-I, P-II, P-III, and P-IV motifs. P-I covers residues 340-350, P-II covers 360-370, P-III covers 380-390, and P-IV covers 400-410. Residues are numbered from 340 to 410. Conserved residues are highlighted in red.

P-V, P-VI, P-VII, and P-VIII motifs. P-V covers residues 410-420, P-VI covers 430-440, P-VII covers 450-460, and P-VIII covers 470-480. Residues are numbered from 410 to 480. Conserved residues are highlighted in red.

P-IX motif. Covers residues 490-500. Residues are numbered from 490 to 500. Conserved residues are highlighted in red.

# Lineage 1.3

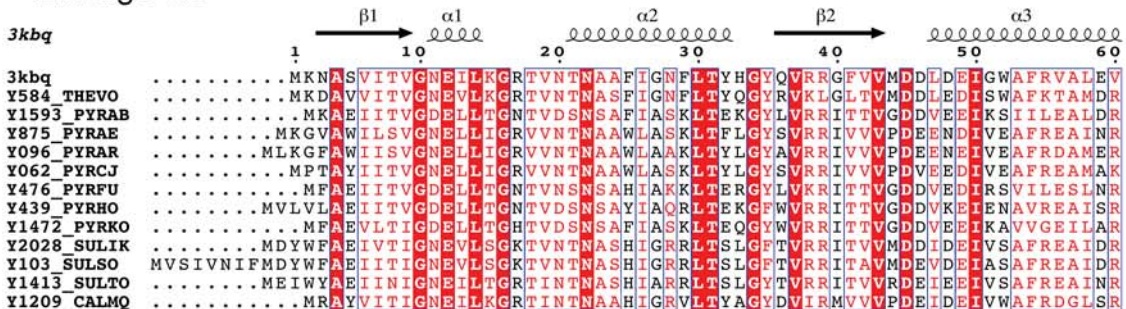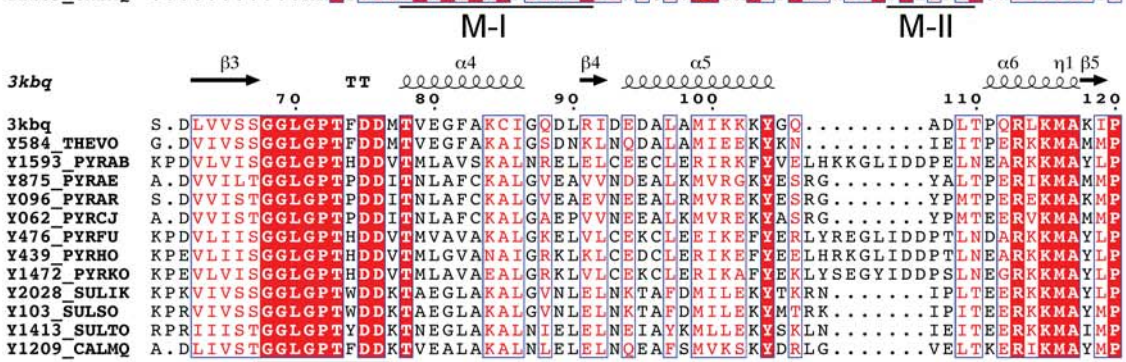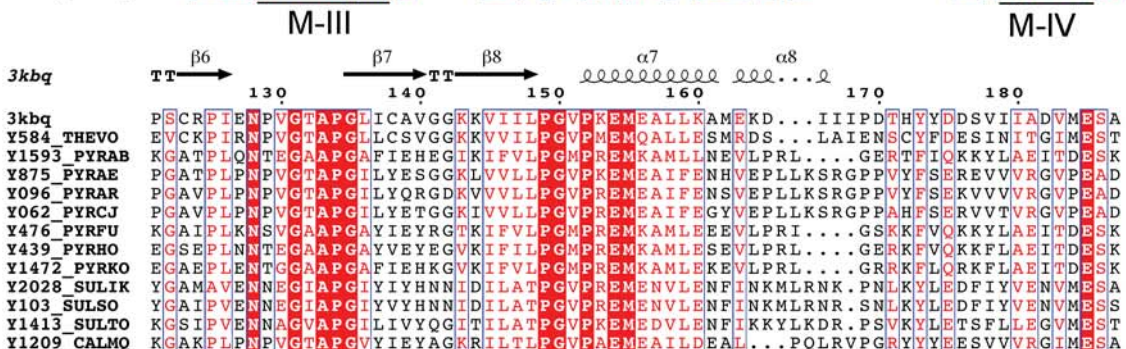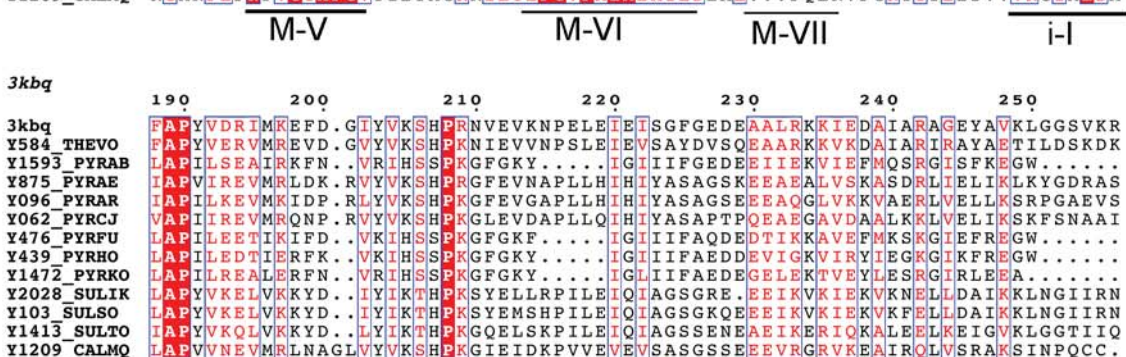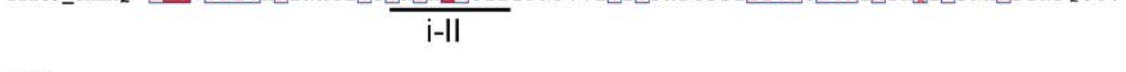

Lineage 2.1

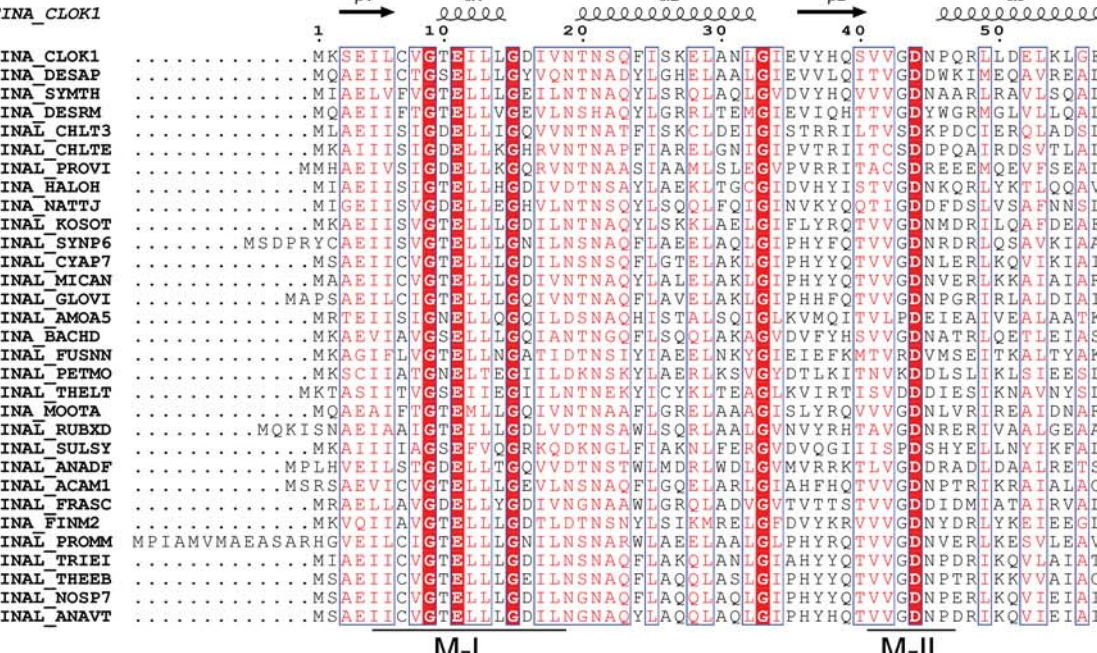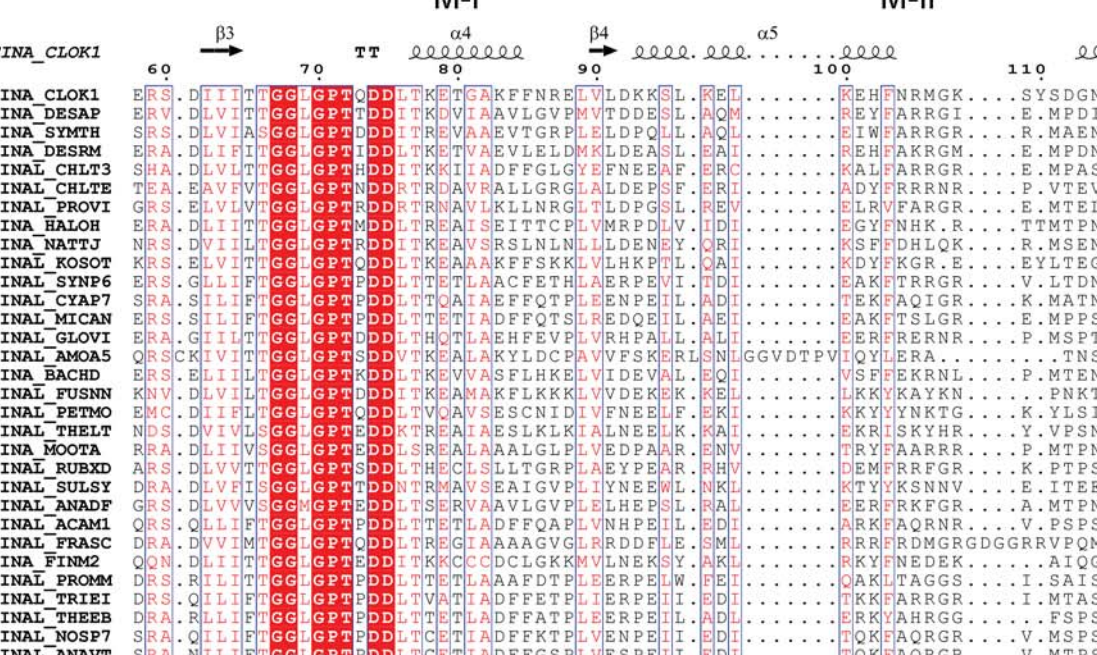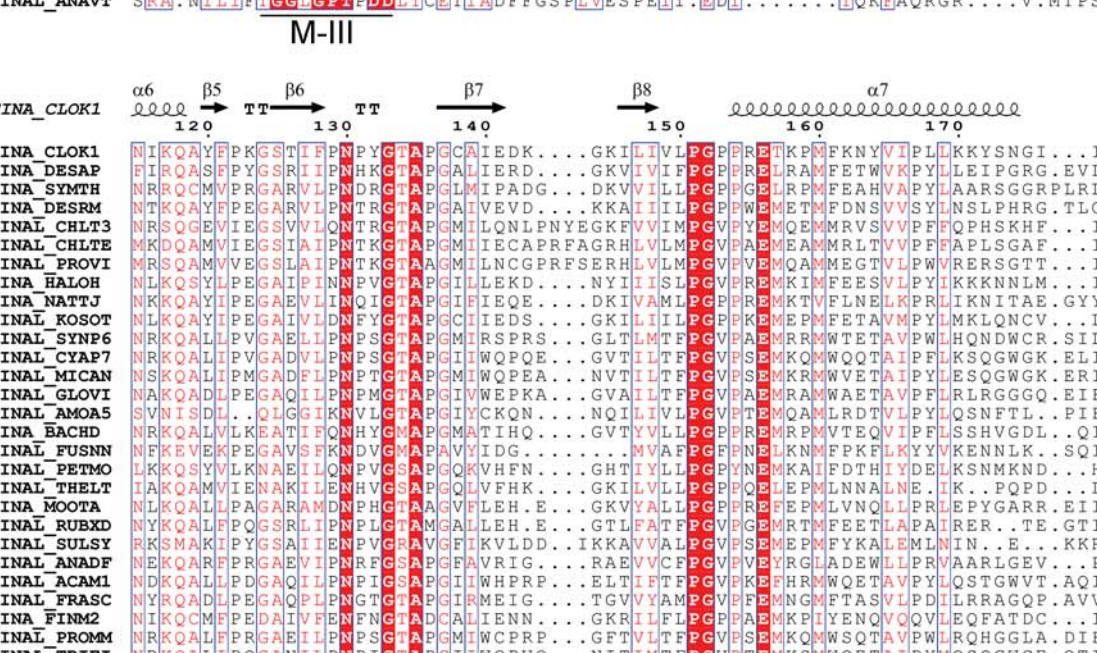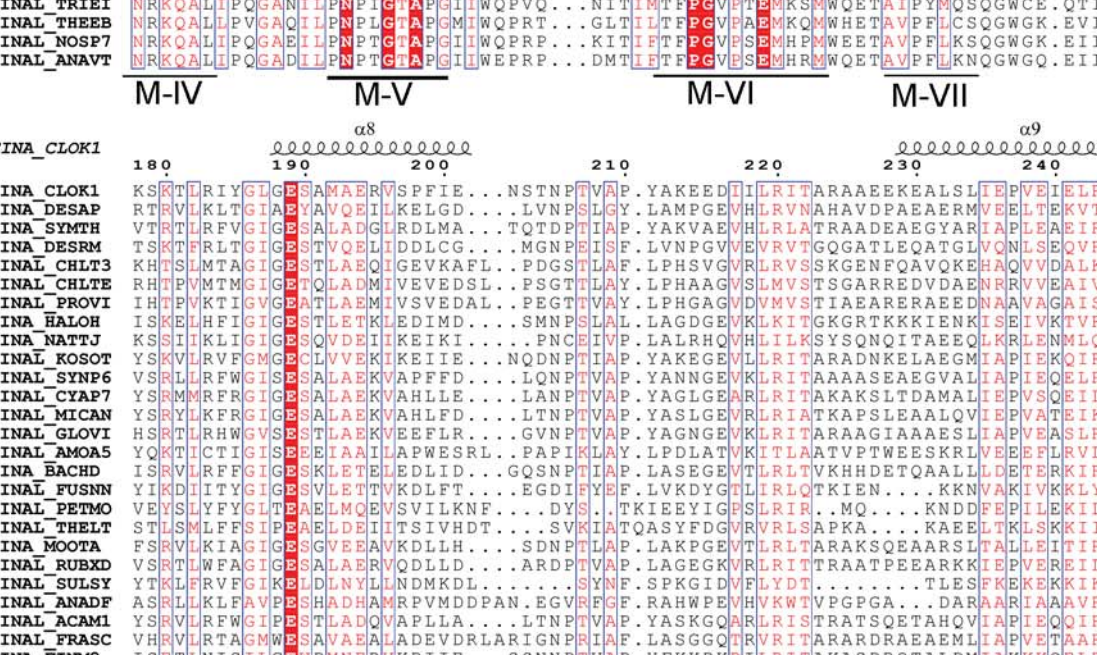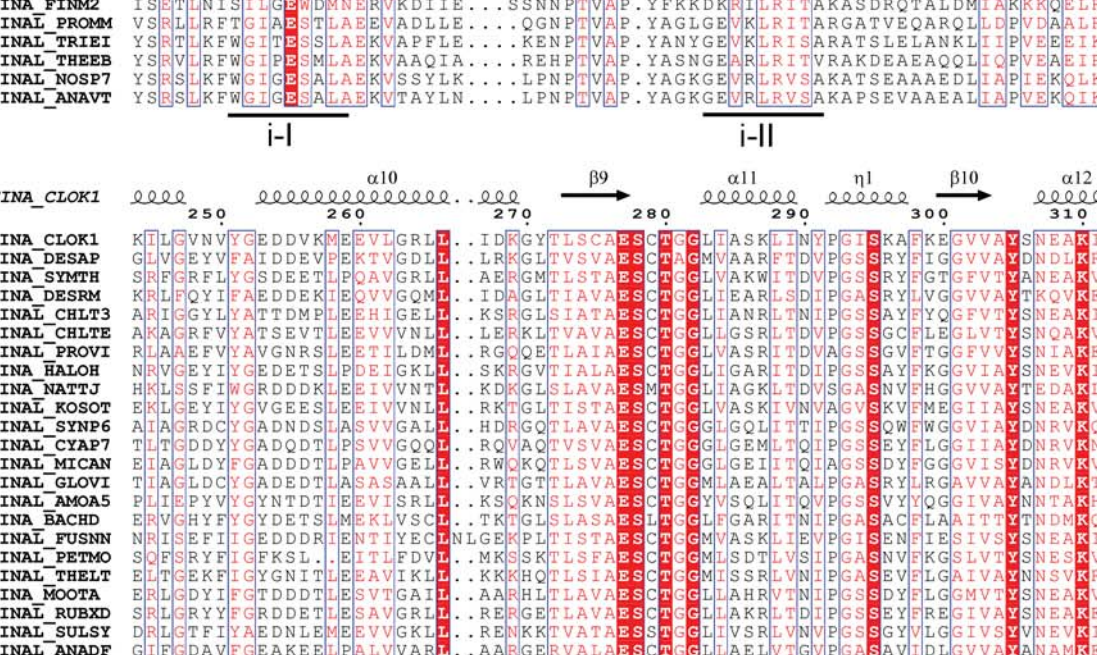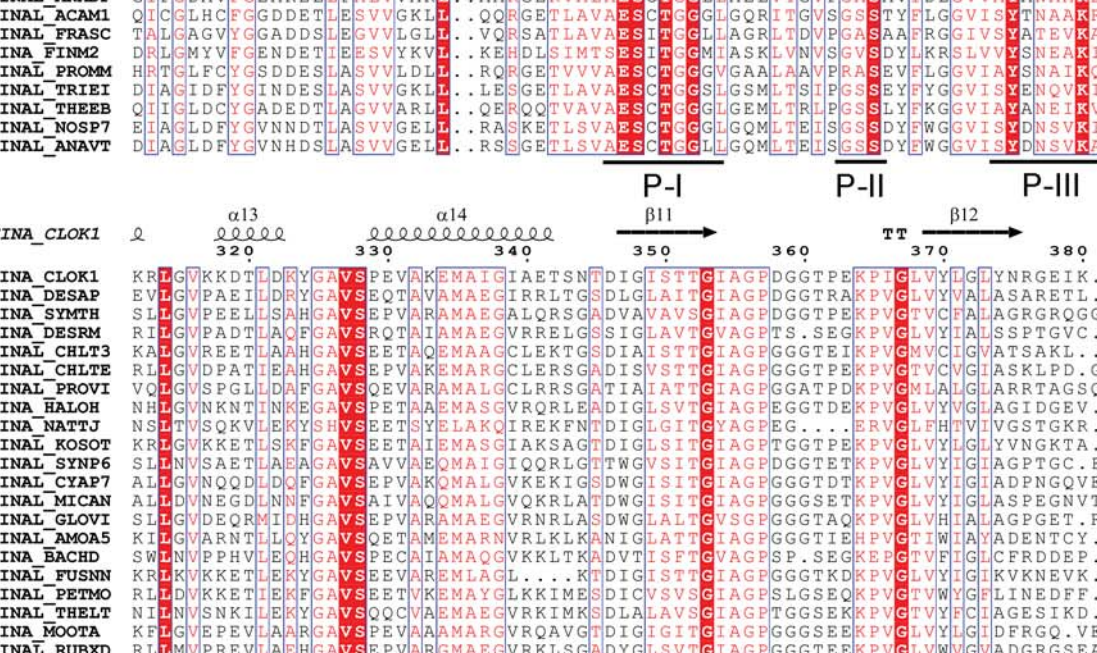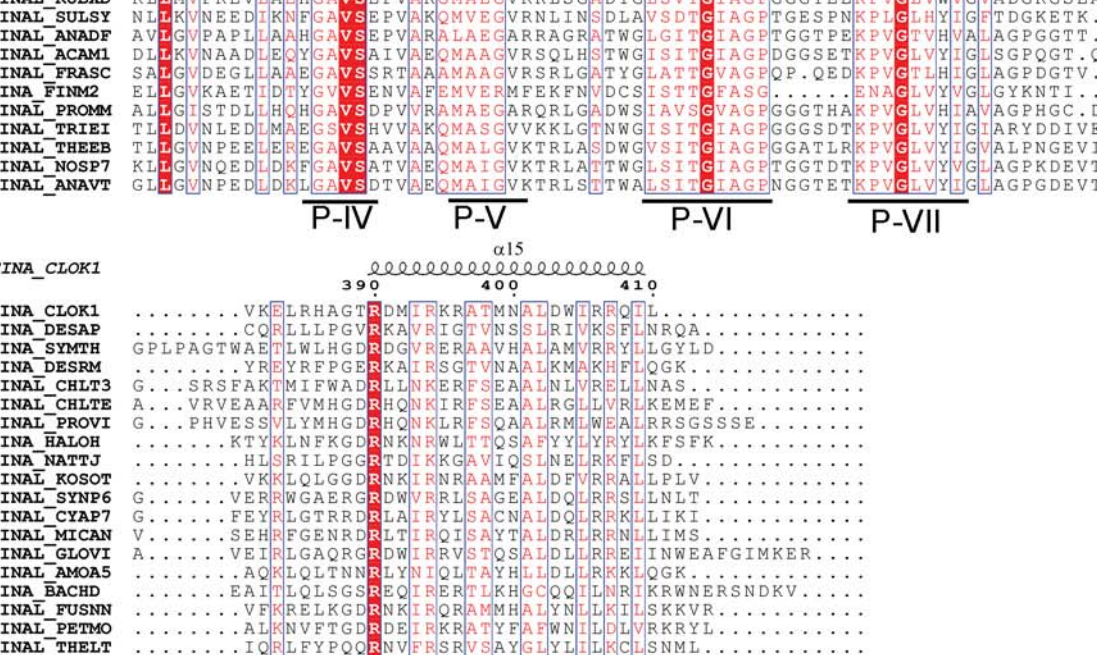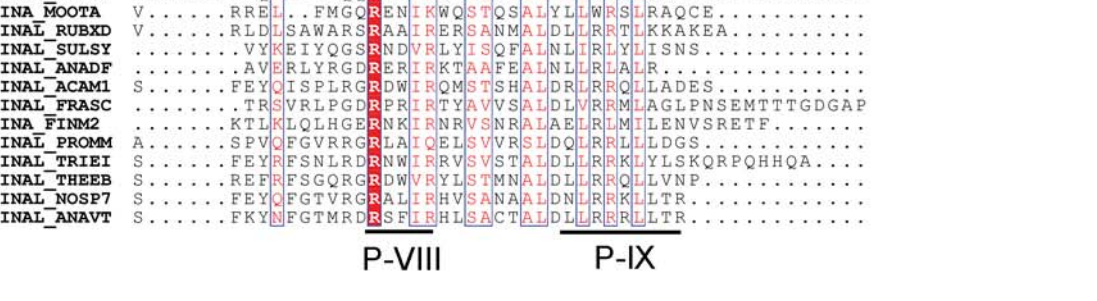



# Lineage 2.2.1.2

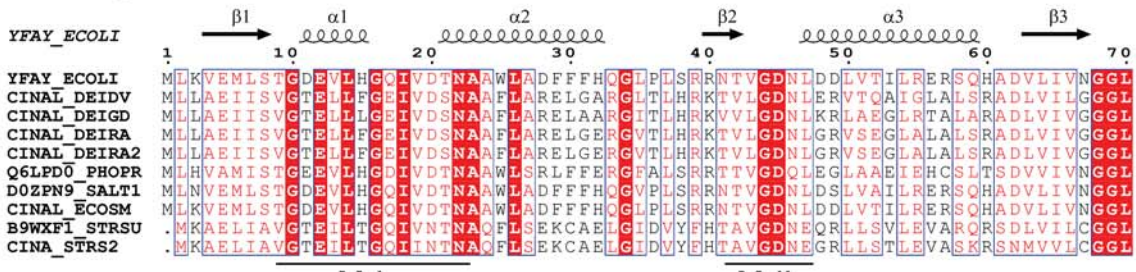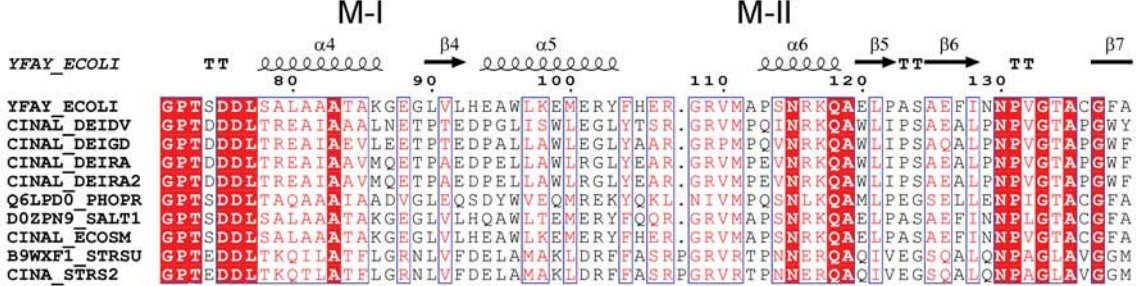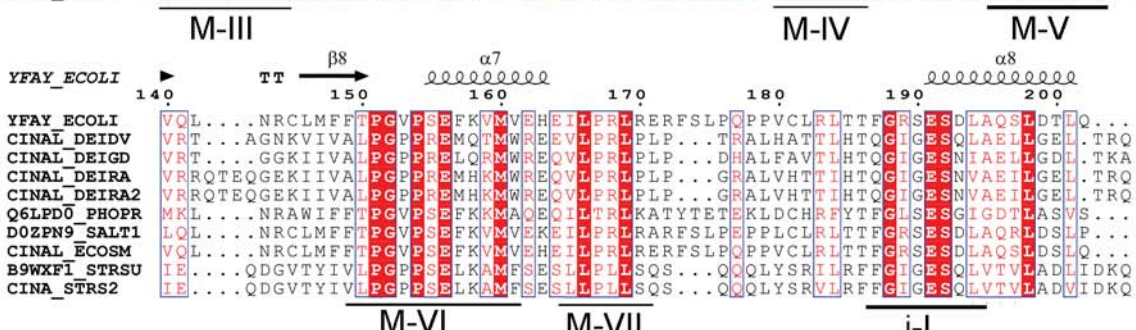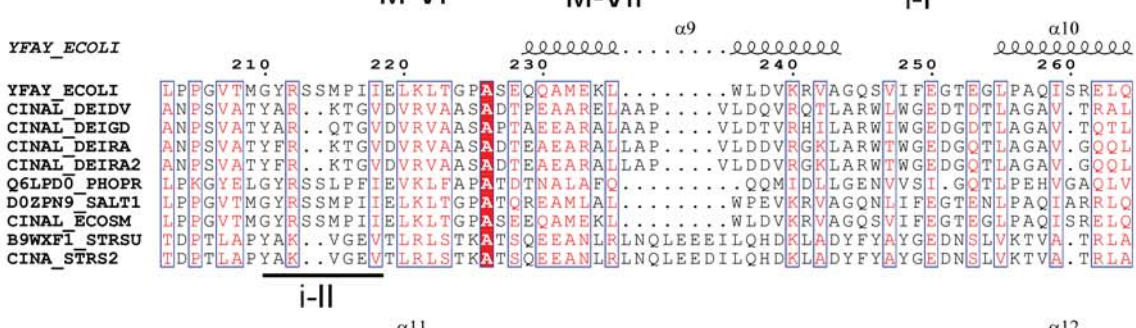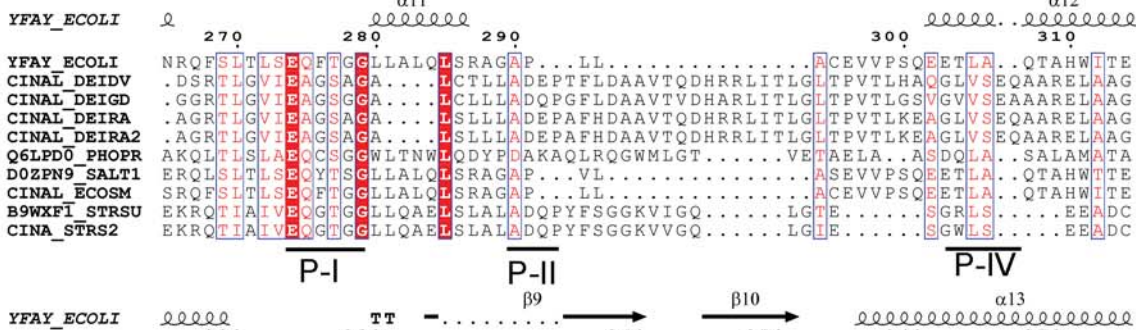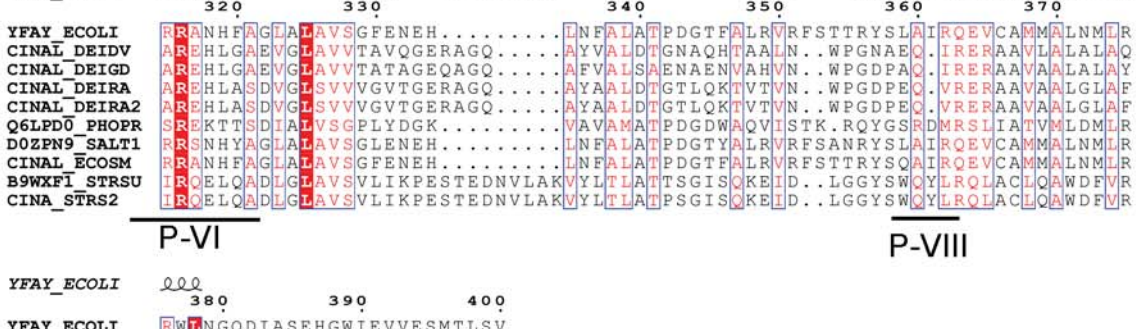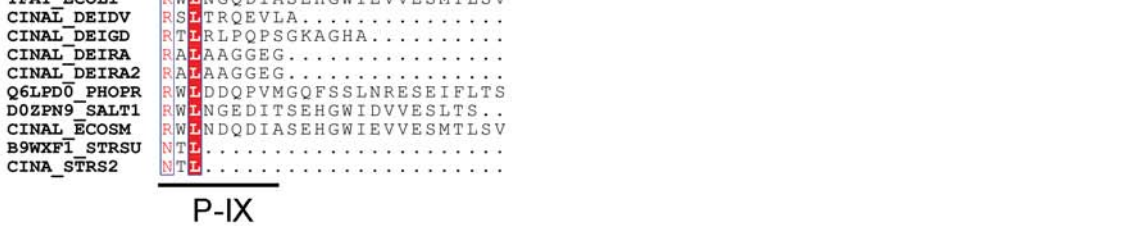

# Lineage 2.2.2.1

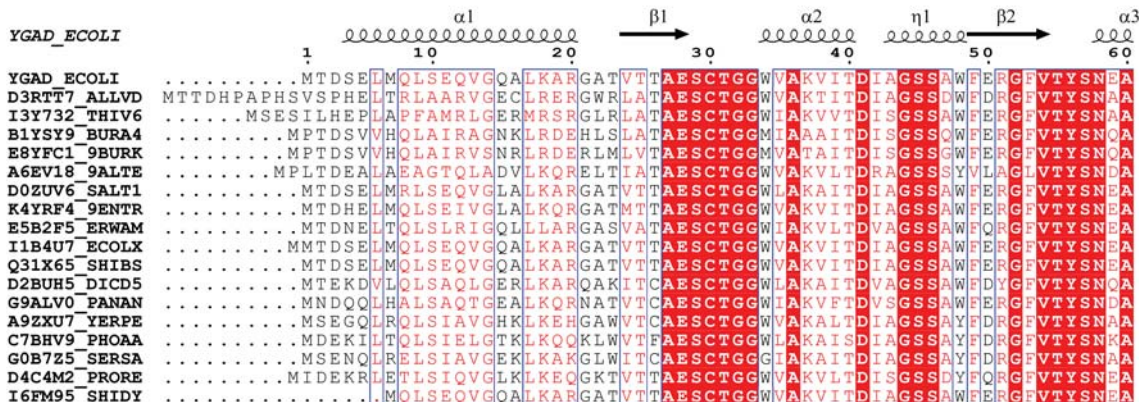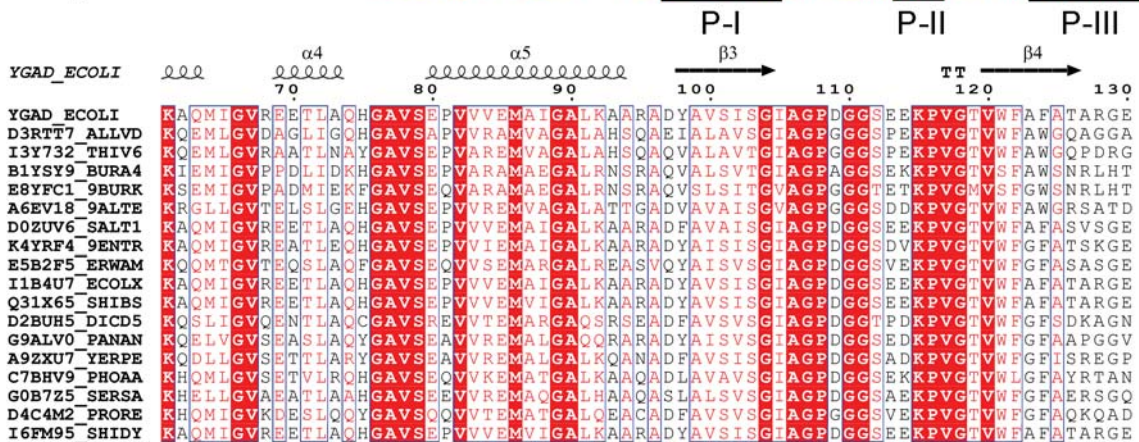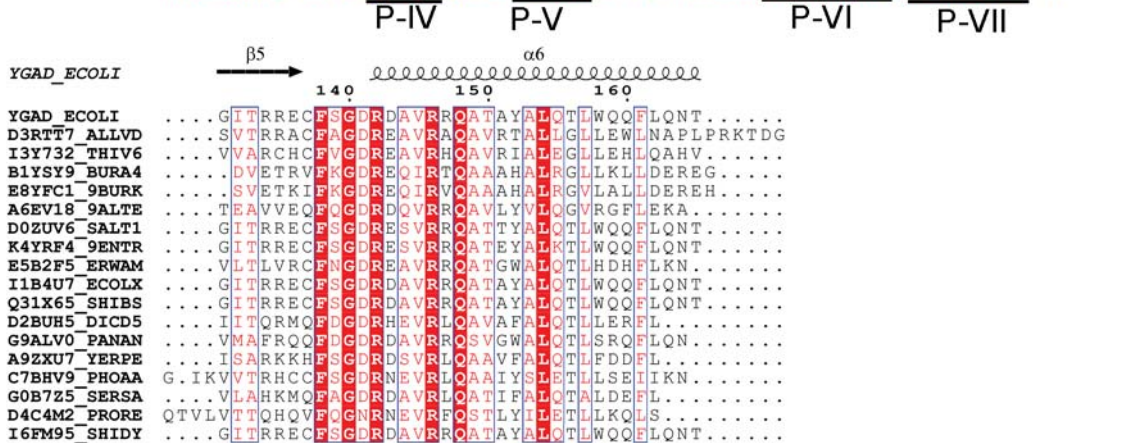

P-IV

P-V

P-VI

P-VII

P-VIII

P-IX

# Lineage 2.2.2.2

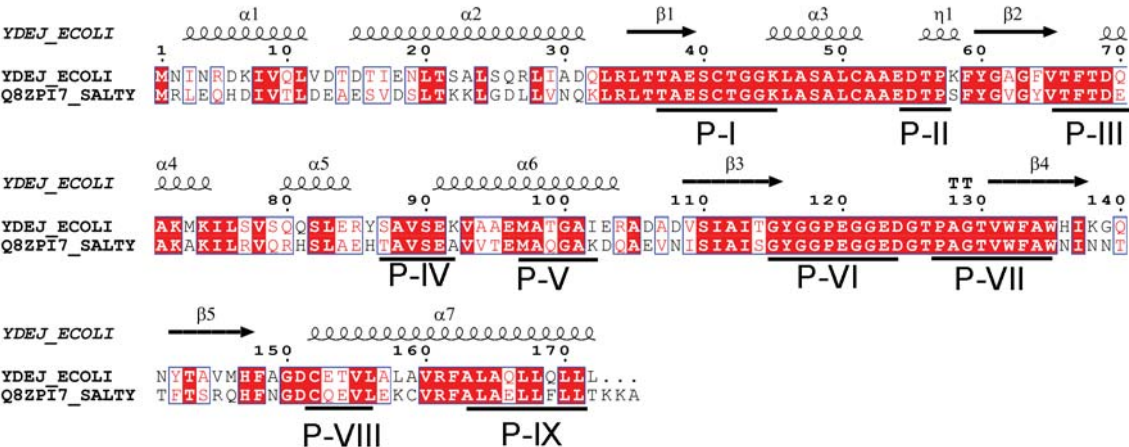



# Lineage 2.2.2.3

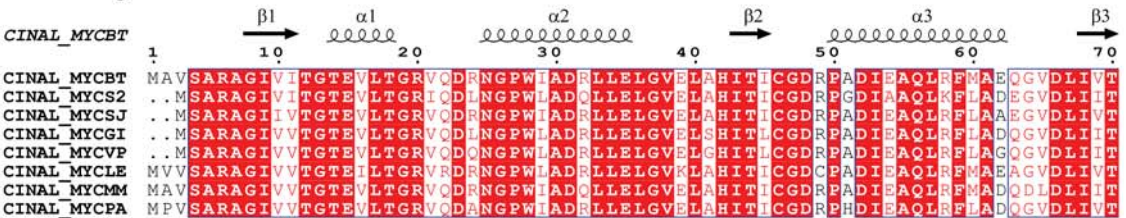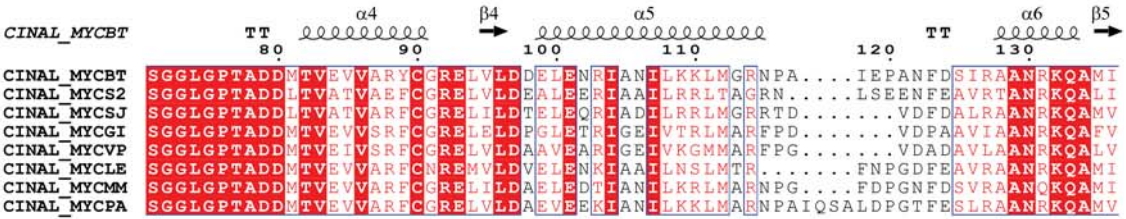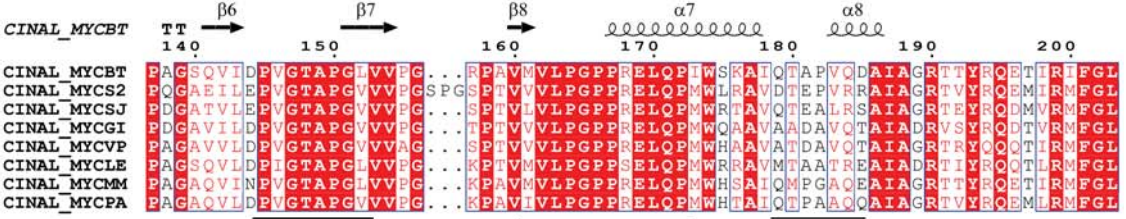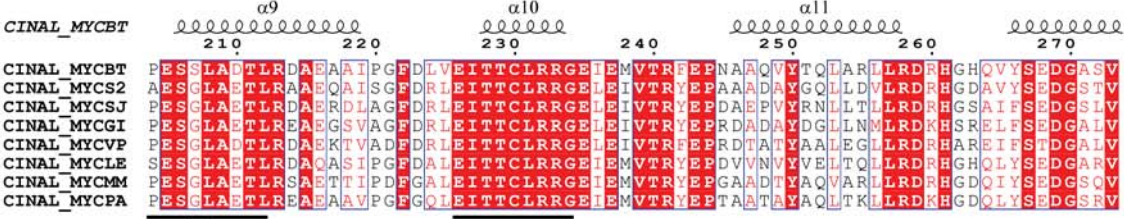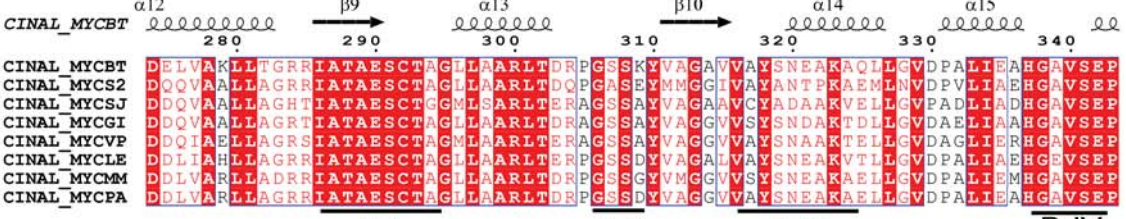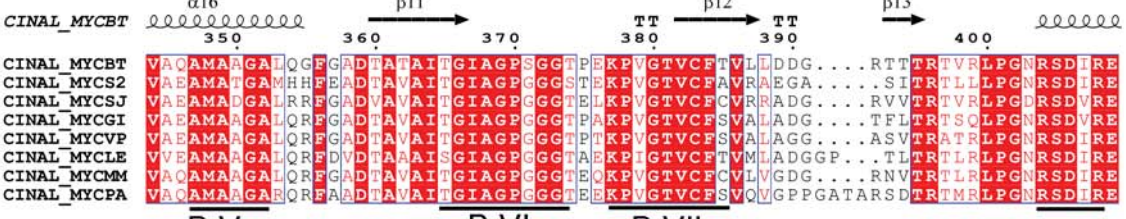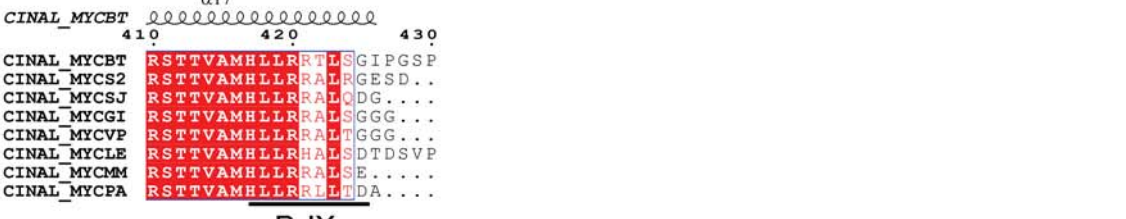

# Lineage 2.2.3.1

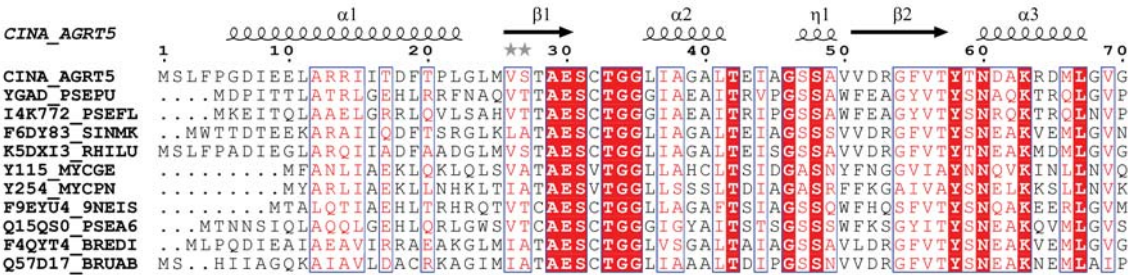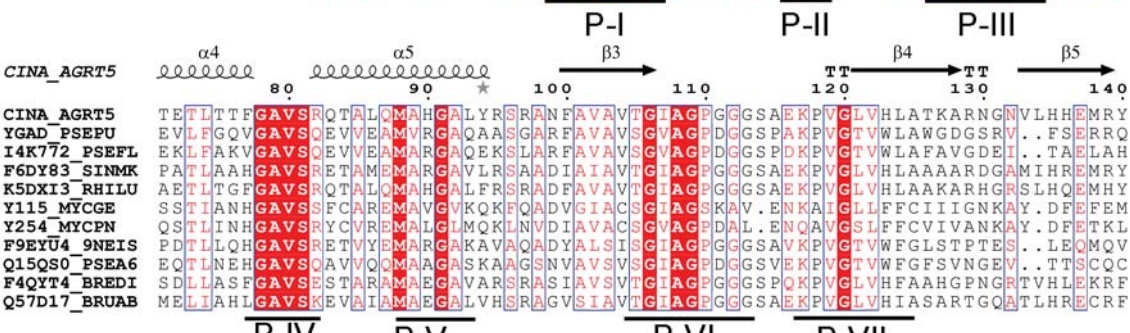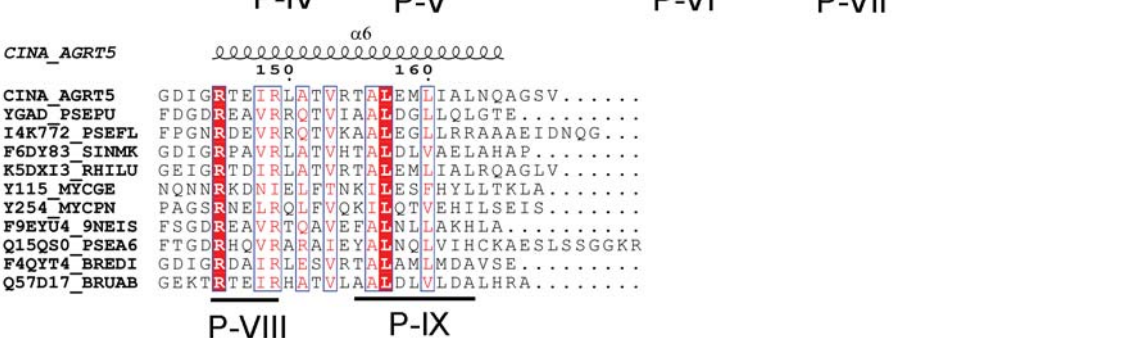

## Lineage 2.2.3.2

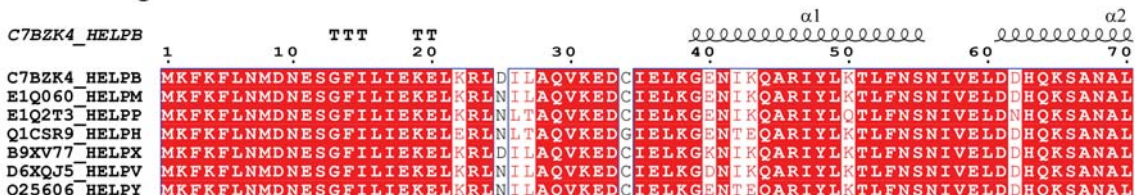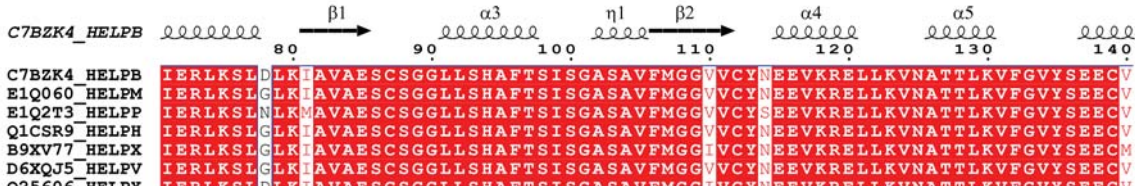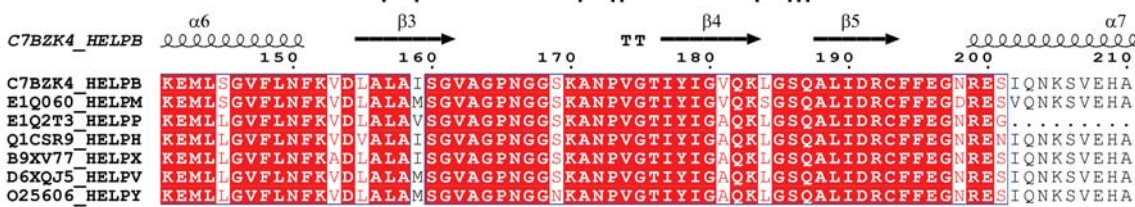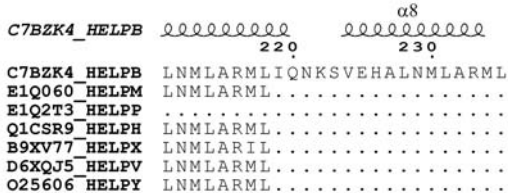

P-IX

# Lineage 2.2.3.3

*C8WFR3\_ZYMMN*

1

C8WFR3\_ZYMMN ..... MTMDN  
 Q5NNF6\_ZYMMO ..... MTMDN  
 E6QAI2\_Z9ZZZ MMD.....NPTDRLRIFLPMRPAALPDAQRLAAWATRAGMDVRVELVATLPDCSATALAIGE...FA  
 B5EQ46\_ACIF5 MTD.....NPTDRLRIFLPMRPAALPDAQRLAAWATRAGIEVRVELVATLPDCSATALAIGE...FA  
 B7J7A7\_ACIF2 MTD.....NPTDRLRIFLPMRPAALPDAQRLAAWATRAGIEVRVELVATLPDCSATALAIGE...FA  
 Q48F93\_PSE14 MCDGRKVITLNLQAVQLQRTFRLLVVG.....RFLTAMNLDLAYRLSSLLLDNRAARYKKGLLYEK

*C8WFR3\_ZYMMN*

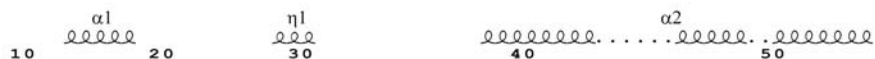

C8WFR3\_ZYMMN **QT**D**GL****SSQ**PSDTEKEALQQKAEQQDIS.....A**ED****SE****E****Q****K****T****I**.....**Q****N****M****E****E****.****N****Q****P****O****E****N****V****H****Y**....  
 Q5NNF6\_ZYMMO **QT**D**GL****SSQ**PSDIEKEALQQKAEQQDIS.....A**Q****D****S****E****K****L****O****K****T****I**.....**Q****N****M****E****E****.****N****Q****P****O****E****N****V****H****Y**....  
 E6QAI2\_Z9ZZZ **NA****AG****W****I****T****A**SCRT.....HL**P****A****D****D****W****A****A****L****R****D****W****A****S****A****Y****L****P****V****C**.....**D****V****P****L****S****L****F****N****D****N****G****T****T**  
 B5EQ46\_ACIF5 **NA****AG****W****I****T****A**SCRT.....HL**P****A****D****D****W****A****S****L****R****D****W****A****S****A****Y****L****P****V****C**.....**D****V****P****L****S****L****F****N****D****N****G****T****T**  
 B7J7A7\_ACIF2 **NA****AG****W****I****T****A**SCRT.....HL**P****A****D****D****W****A****S****L****R****D****W****A****S****A****Y****L****P****V****C**.....**D****V****P****L****S****L****F****N****D****N****G****T****T**  
 Q48F93\_PSE14 **T****S****K****G****F****R****R****O**SLHPA.GRSQKKAERNDRNGQKAG**Q****E****R****C****A****N****R****Q****W****Q****T****R****F****K****V****A****L****S****Q****E****S****L****L****O****A****S****M****N****E**....

*C8WFR3\_ZYMMN*

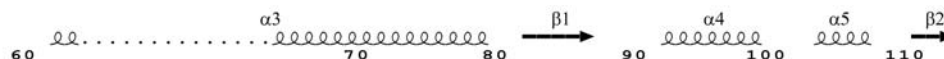

C8WFR3\_ZYMMN ..**N****L****P****N****E**.....**L****V****T****R****A****S****L****V****I****D****A****N****R****A****A****G****Q****R****I****A****V****A****E****S****C****T****G****G****L****V****M****A****A****L****T****E****V****P****G****A****S****D****V****F****D****A****G****F****V**  
 Q5NNF6\_ZYMMO ..**N****L****P****N****E**.....**L****V****T****R****A****S****L****V****I****D****A****N****R****A****A****G****Q****R****I****A****V****A****E****S****C****T****G****G****L****V****M****A****A****L****T****E****V****P****G****A****S****D****V****F****D****A****G****F****V**  
 E6QAI2\_Z9ZZZ **PE****V****L****P****G****E****Y****W****E****A****G****T****P****C****A****M****S****L****H****M****A****P****P****E****W****S****L****L****Q****H****A****R****A****R****D****A****R****L****A****L****A****E****S****C****T****G****G****D****L****A****A****R****I****T****A****L****P****G****S****S****A****L****L****R****H****G****F****V**  
 B5EQ46\_ACIF5 **PE****V****L****P****G****E****Y****W****E****A****G****T****P****C****A****M****S****L****H****M****A****P****P****E****W****S****L****L****Q****H****A****R****A****R****D****A****R****L****A****L****A****E****S****C****T****G****G****D****L****A****A****R****I****T****A****L****P****G****S****S****A****L****L****R****H****G****F****V**  
 B7J7A7\_ACIF2 **PE****V****L****P****G****E****Y****W****E****A****G****T****P****C****A****M****S****L****H****M****A****P****P****E****W****S****L****L****Q****H****A****R****A****R****D****A****R****L****A****L****A****E****S****C****T****G****G****D****L****A****A****R****I****T****A****L****P****G****S****S****A****L****L****R****H****G****F****V**  
 Q48F93\_PSE14 ..**N****T****V****D****E**.....**I****T****G****L****A****D****T****L****G****R****L****L****D****A****M****N****A****Q****V****T****T****A****E****S****C****T****G****G****I****A****E****A****I****T****R****I****A****G****S****A****W****F****E****A****G****Y****V**

P-I P-II

*C8WFR3\_ZYMMN*

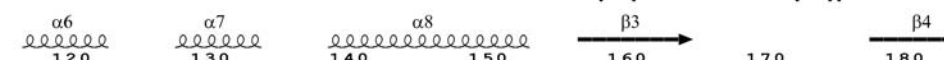

C8WFR3\_ZYMMN **T****Y****A****N****Q****A****K****I****D****L****L****N****I****S****Q****D****V****I****E****T****F****G****S****V****S****L****A****V****A****W****A****M****A****R****N****A****V****E****K****S****D****A****D****I****A****V****A****I****T****G****I****A****G****P****T****G****G****D****E****R****K****P****V****G****T****V****F****F****A****R**  
 Q5NNF6\_ZYMMO **T****Y****A****N****Q****A****K****I****D****L****L****N****I****S****Q****D****V****I****E****T****F****G****S****V****S****L****A****V****A****W****A****M****A****R****N****A****V****E****K****S****D****A****D****I****A****V****A****I****T****G****I****A****G****P****T****G****G****D****E****R****K****P****V****G****T****V****F****F****A****R**  
 E6QAI2\_Z9ZZZ **T****Y****S****N****E****A****R****K****I****Q****L****L****K****V****Q****E****A****T****L****S****R****V****G****A****V****A****E****E****T****A****L****E****M****L****A****G****A****L****H****E****.****A****D****I****A****A****A****I****T****G****I****A****G****P****G****A****V****P****G****K****P****V****G****T****V****C****I****A****W**  
 B5EQ46\_ACIF5 **T****Y****S****N****E****A****R****K****I****Q****L****L****K****V****Q****E****A****T****L****S****R****V****G****A****V****A****E****E****T****A****L****E****M****L****A****G****A****L****H****E****.****A****D****I****A****A****A****I****T****G****I****A****G****P****G****A****V****P****G****K****P****V****G****T****V****C****I****A****W**  
 B7J7A7\_ACIF2 **T****Y****S****N****E****A****R****K****I****Q****L****L****K****V****Q****E****A****T****L****S****R****V****G****A****V****A****E****E****T****A****L****E****M****L****A****G****A****L****H****E****.****A****D****I****A****A****A****I****T****G****I****A****G****P****G****A****V****P****G****K****P****V****G****T****V****C****I****A****W**  
 Q48F93\_PSE14 **T****Y****S****N****A****C****K****E****R****Q****L****G****V****P****E****A****L****F****V****E****A****G****A****V****S****Q****P****V****A****V****E****A****M****V****R****G****A****Q****R****E****S****G****A****R****E****F****A****V****A****V****S****G****V****A****G****E****G****S****P****D****K****P****V****G****T****V****W****L****C****W**

P-III P-IV P-V P-VI P-VII

*C8WFR3\_ZYMMN*

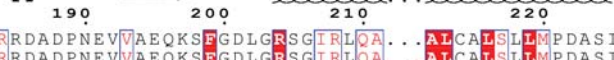

C8WFR3\_ZYMMN **A****R****R****D****A****D****P****N****E****V****V****A****E****Q****K****S****F****G****D****L****G****R****S****G****I****R****L****Q****A**.....**A****L****C****A****L****S****L****L****M****P****D****A****S****I****S****Q****G**  
 Q5NNF6\_ZYMMO **A****R****R****D****A****D****P****N****E****V****V****A****E****Q****K****S****F****G****D****L****G****R****S****G****I****R****L****Q****A**.....**A****L****C****A****L****S****L****L****M****P****D****A****S****I****S****Q****G**  
 E6QAI2\_Z9ZZZ **G****A****R****G****M****E****P****Q****V****R****T**...**C****H****F****H****G****.****D****R****W****S****V****Q****Y****A****A****G****S****V****A****L****G****L****L****G****L****L****R****.**  
 B5EQ46\_ACIF5 **G****A****R****G****M****E****P****Q****V****R****T**...**C****H****F****H****G****.****D****R****W****S****V****Q****Y****A****A****G****S****V****A****L****G****L****L****G****L****L****R****.**  
 B7J7A7\_ACIF2 **G****A****R****G****M****E****P****Q****V****R****T**...**C****H****F****H****G****.****D****R****W****S****V****Q****Y****A****A****G****S****V****A****L****G****L****L****G****L****L****R****.**  
 Q48F93\_PSE14 **G****K****D****D****A****L****.****.****V****A****Q****R****R****Q****F****D****G****.****D****R****D****Q****V****R****Q****T****V****E****A****L****O****G****L****I****O****L****A****R****G****E****M****P****K****Q****G**

P-VIII P-IX

# Lineage 2.2.3.4

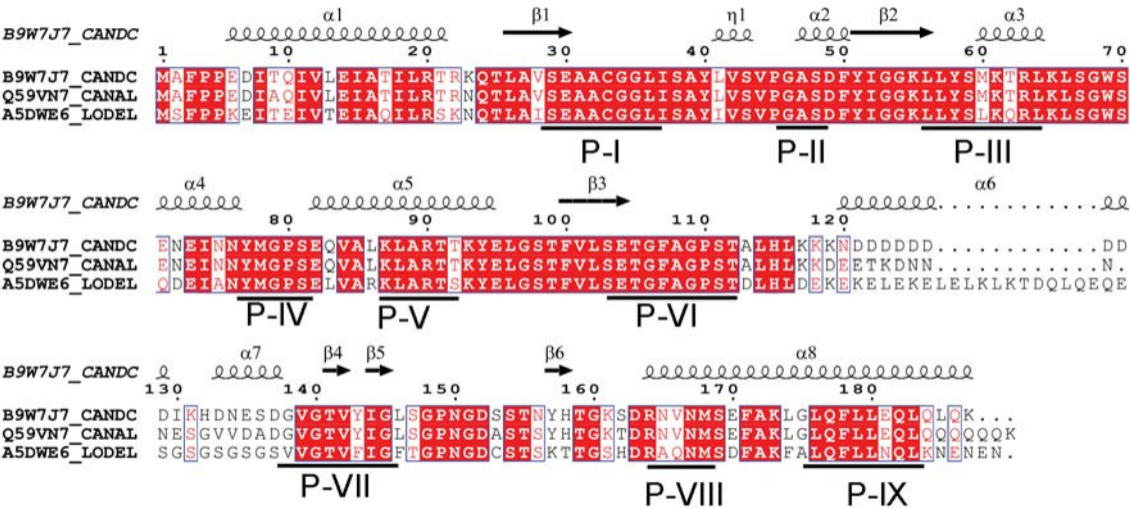

Supplement: pone.0082705.s007.pdf [file pone.0082705.s007.pdf]
