# Supplementary material for: New Insights into the Phylogeny and Molecular Classification of Nicotinamide Mononucleotide Deamidases
Source: PubMed Central journal article supplement (PMC3855486; doi:10.1371/journal.pone.0082705), 2013-12-05

LINEAGE 1.2

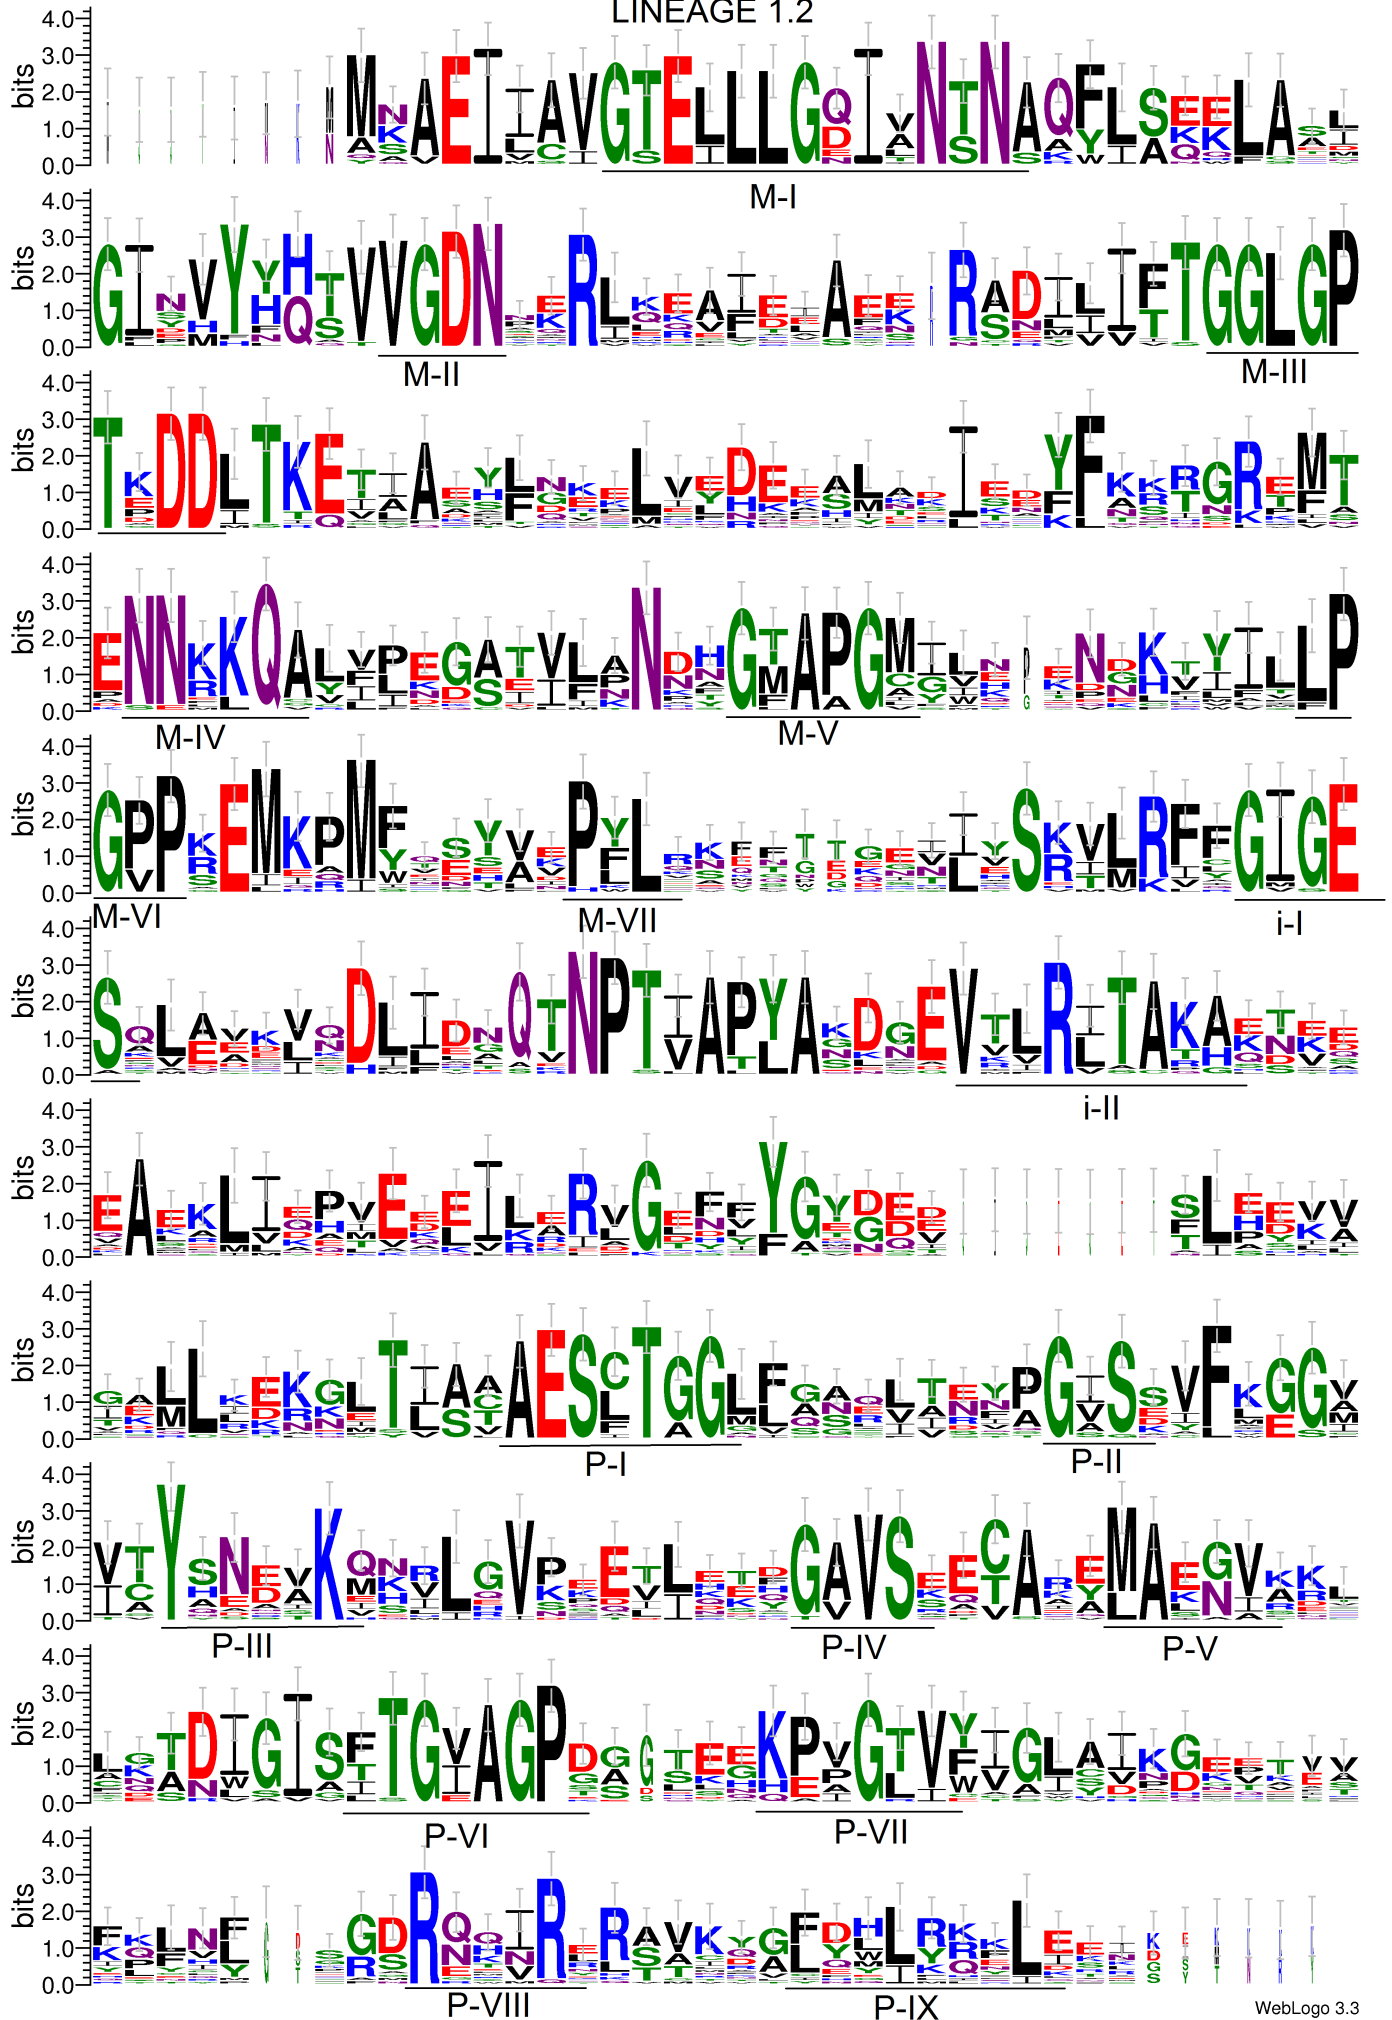

LINEAGE 1.3

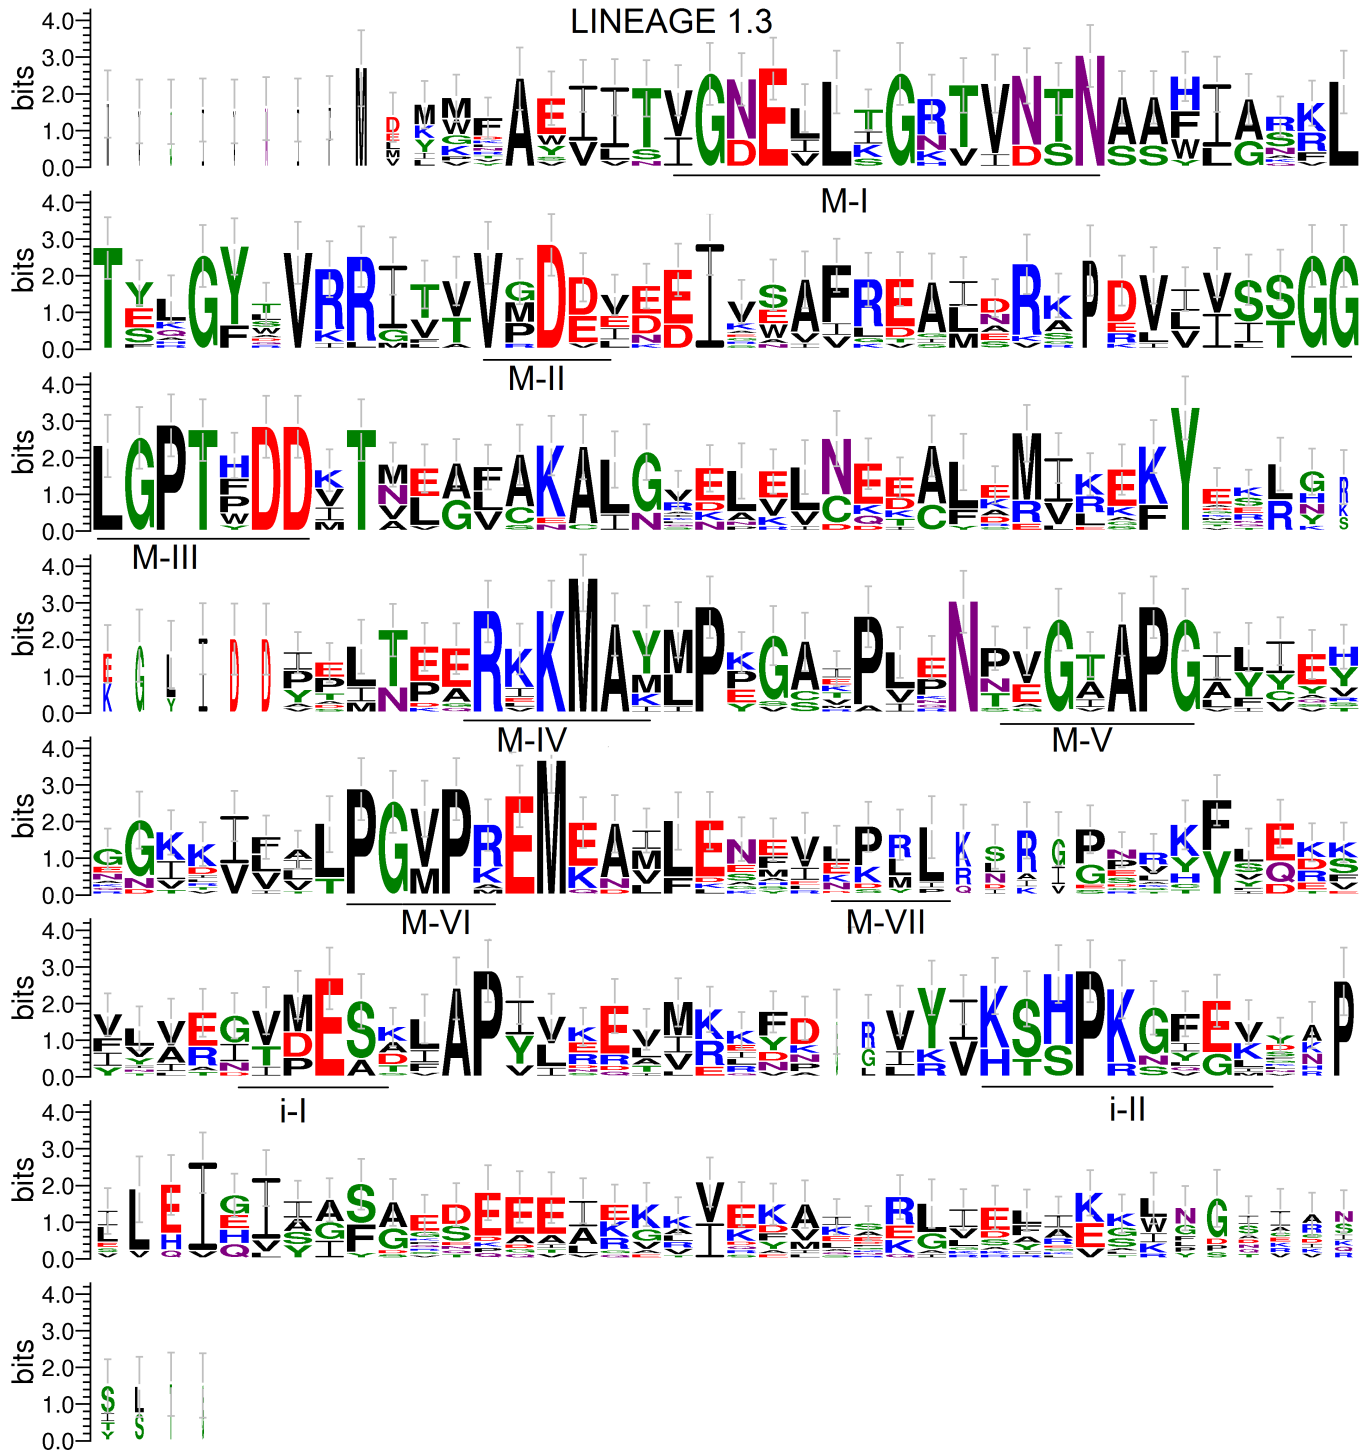

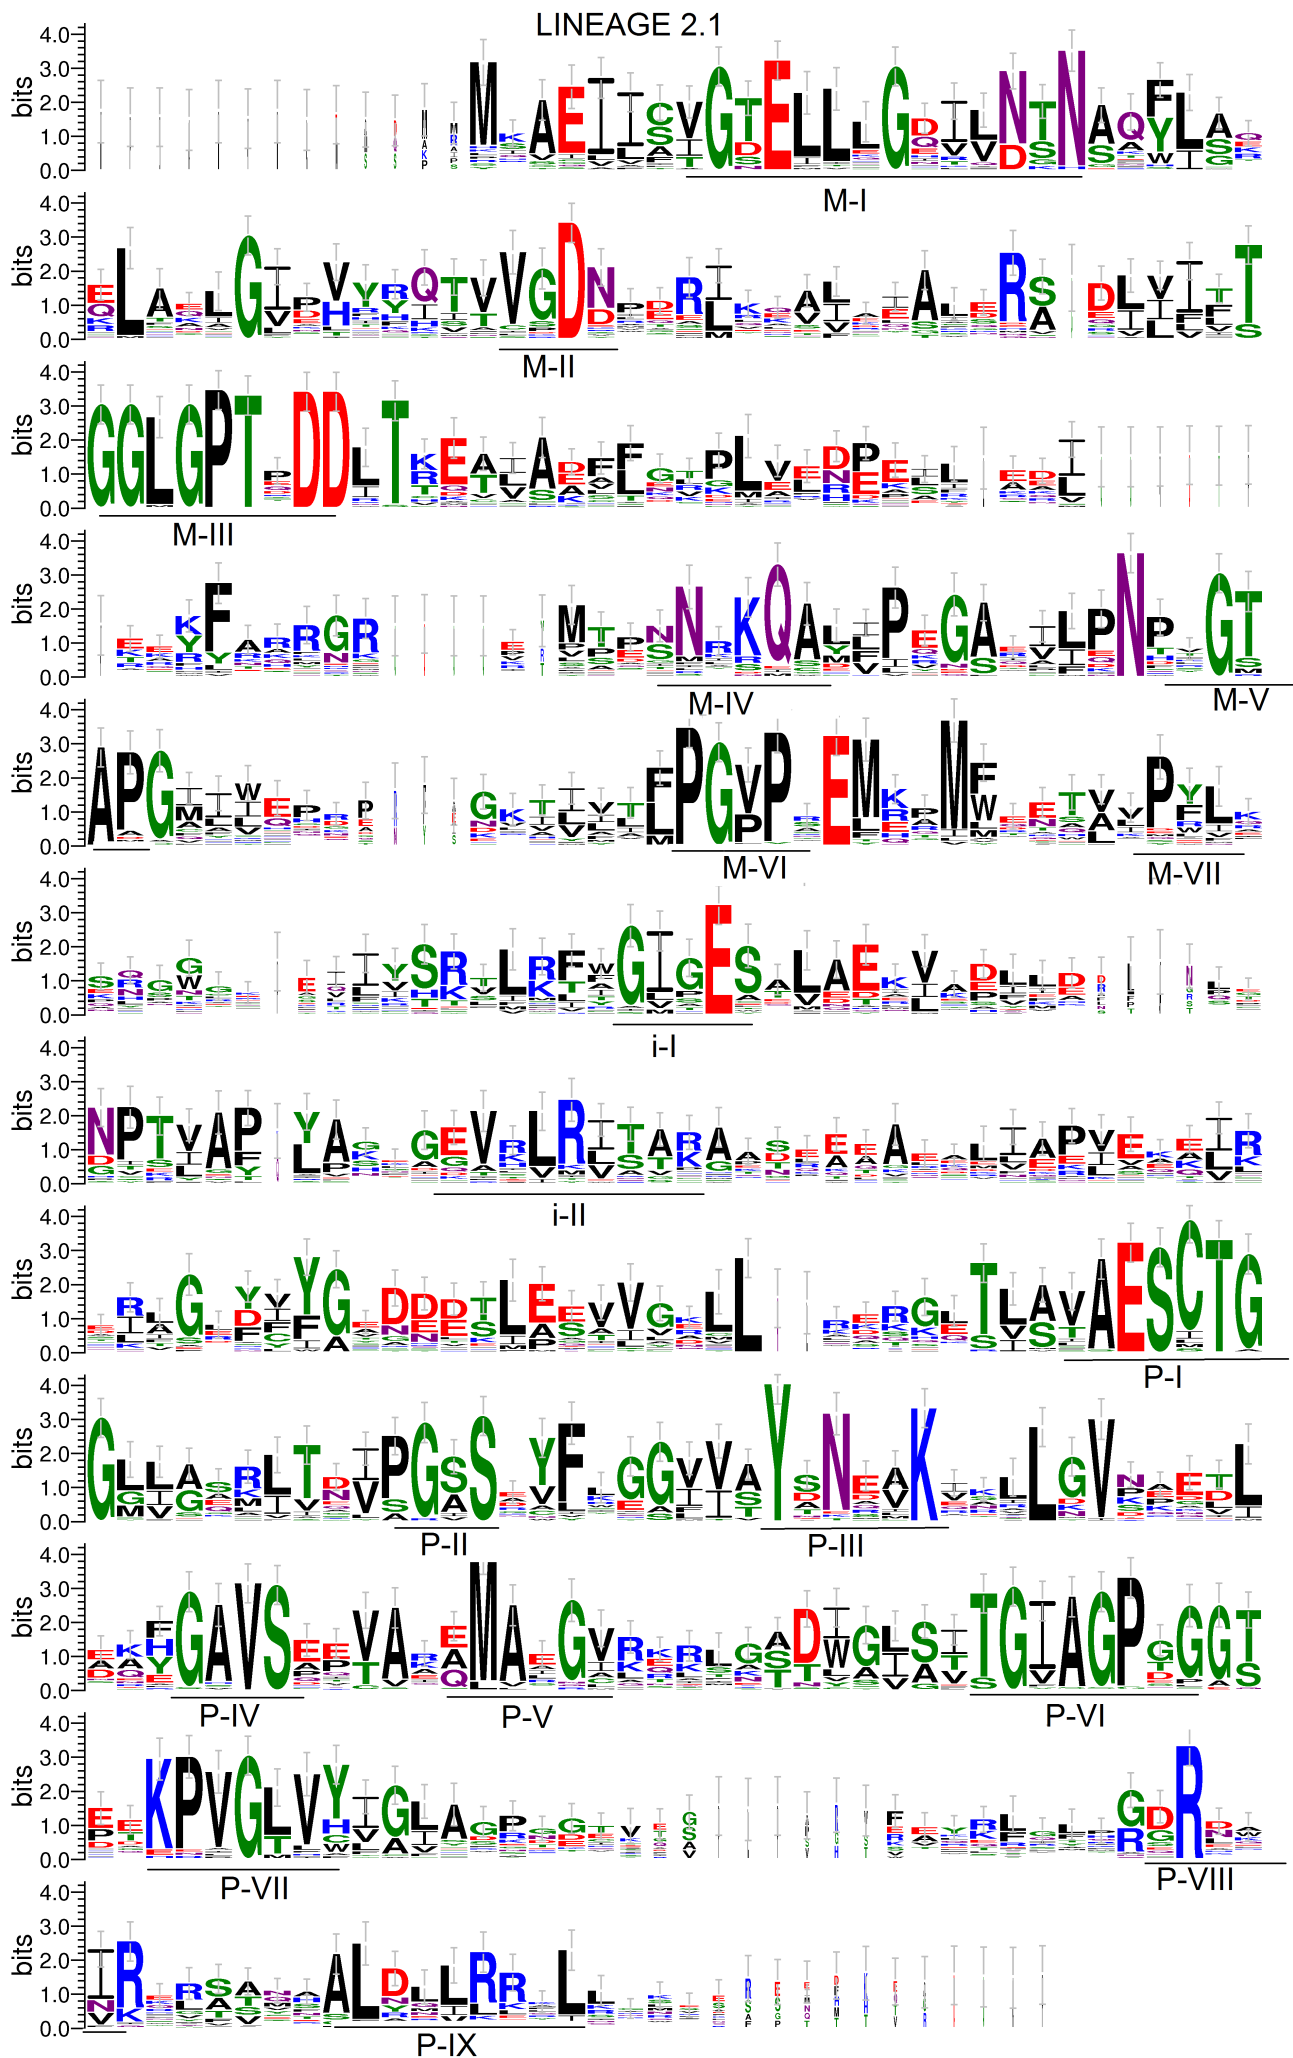

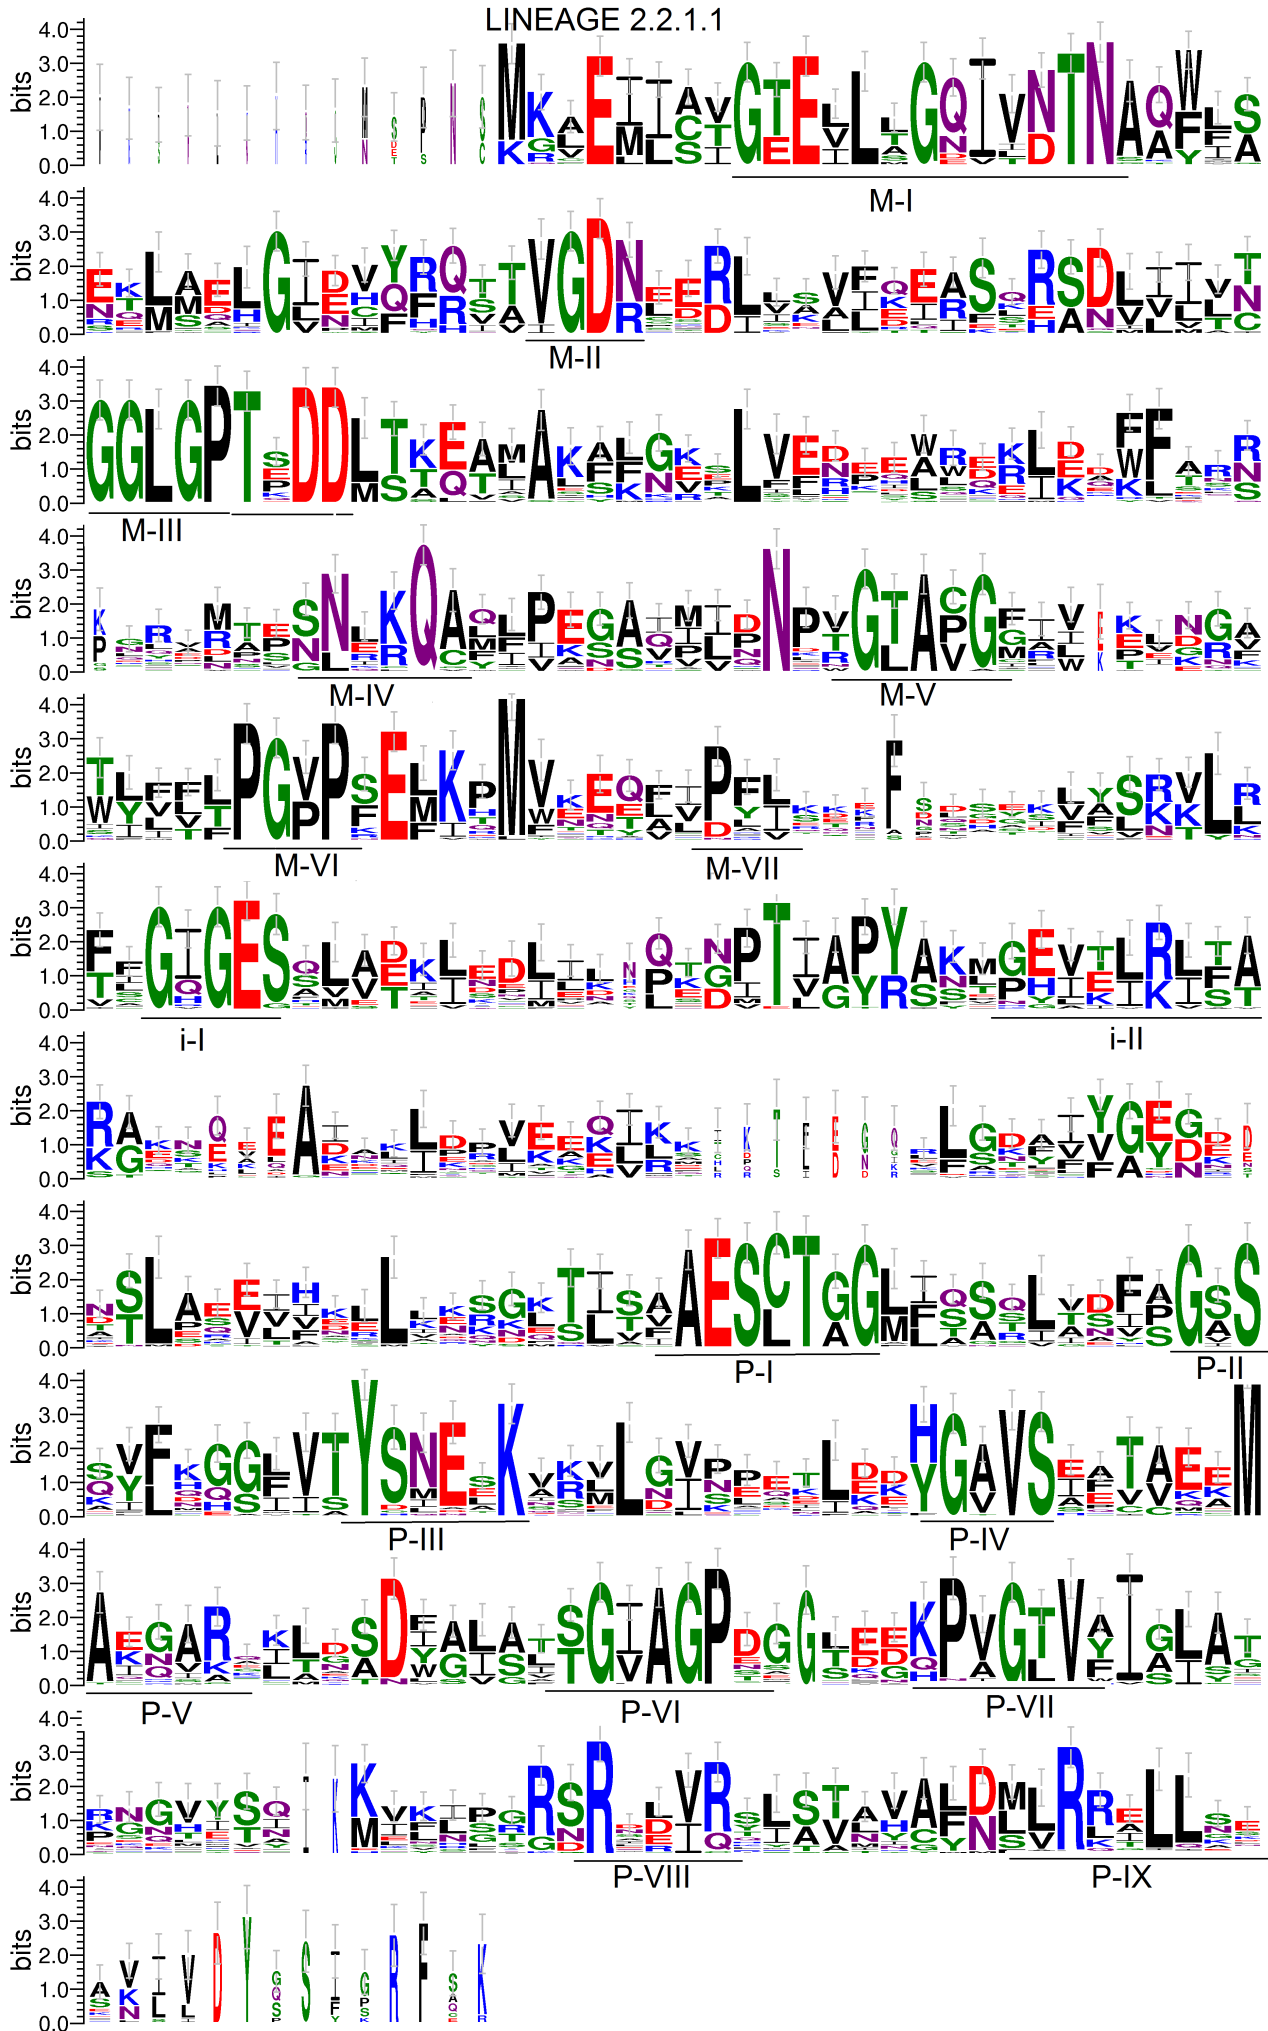

LINEAGE 2.2.1.2

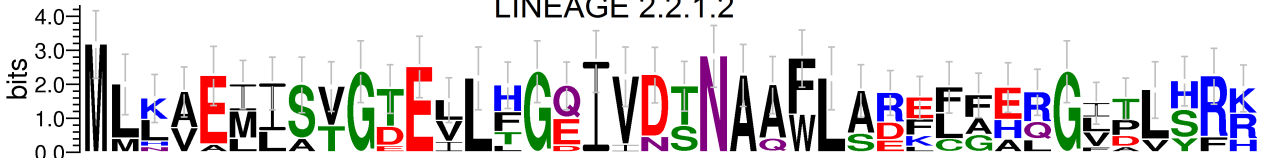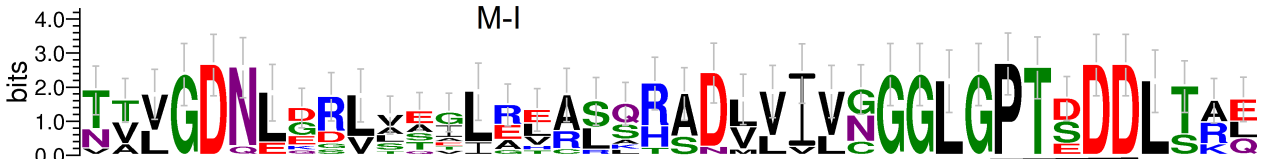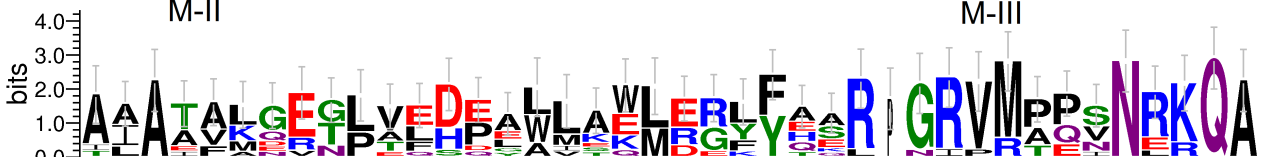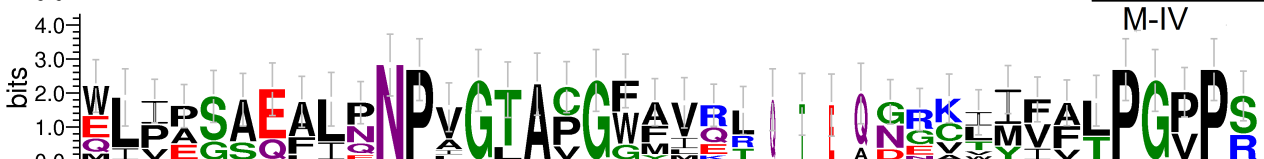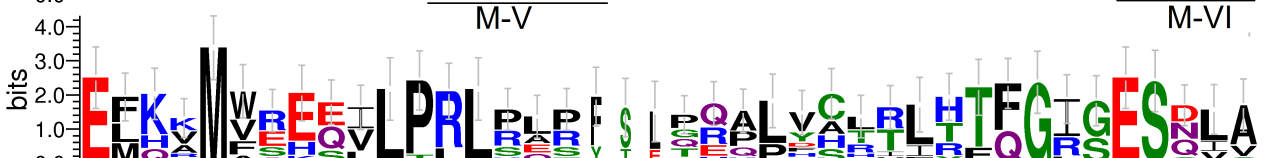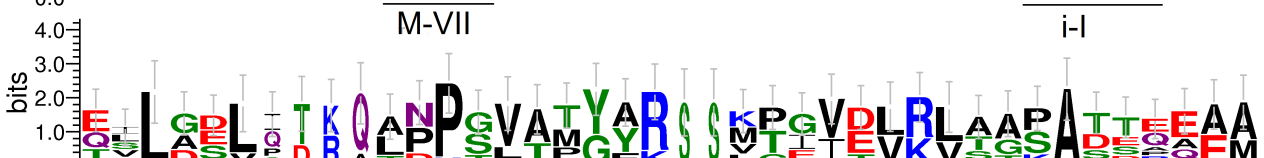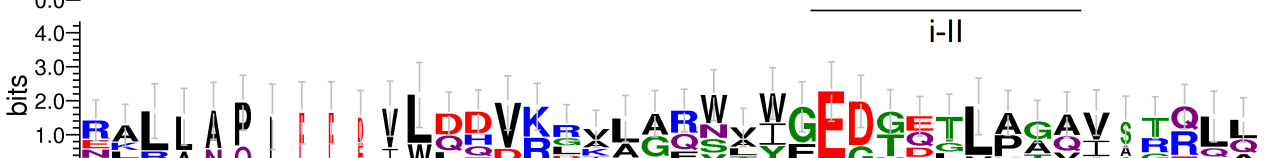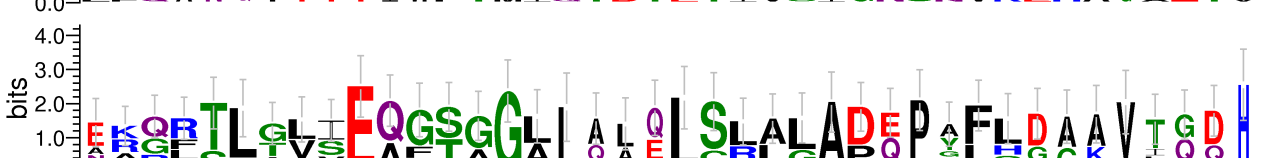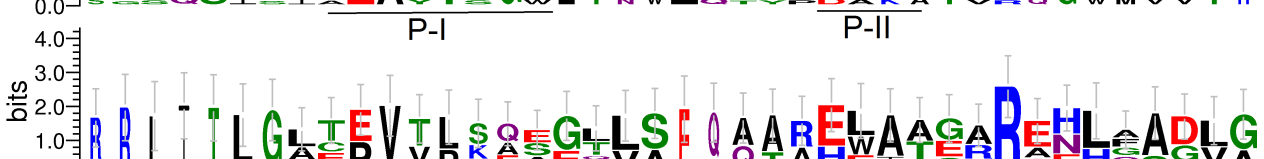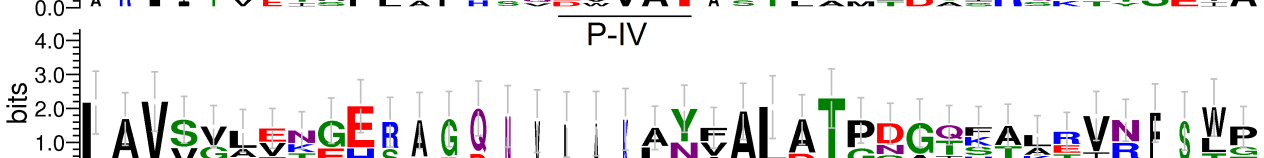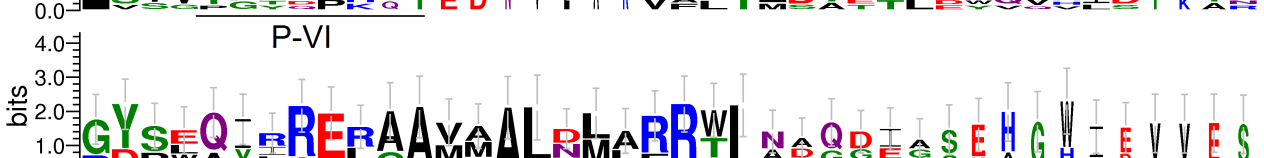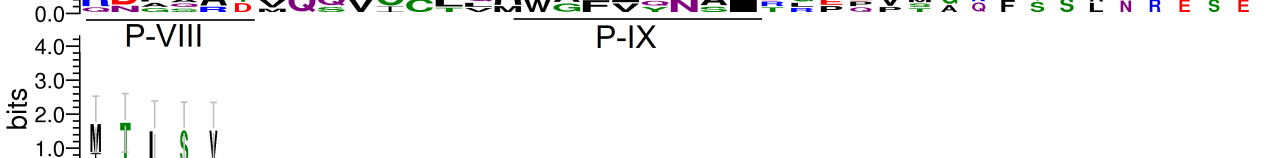

LINEAGE 2.2.2.1

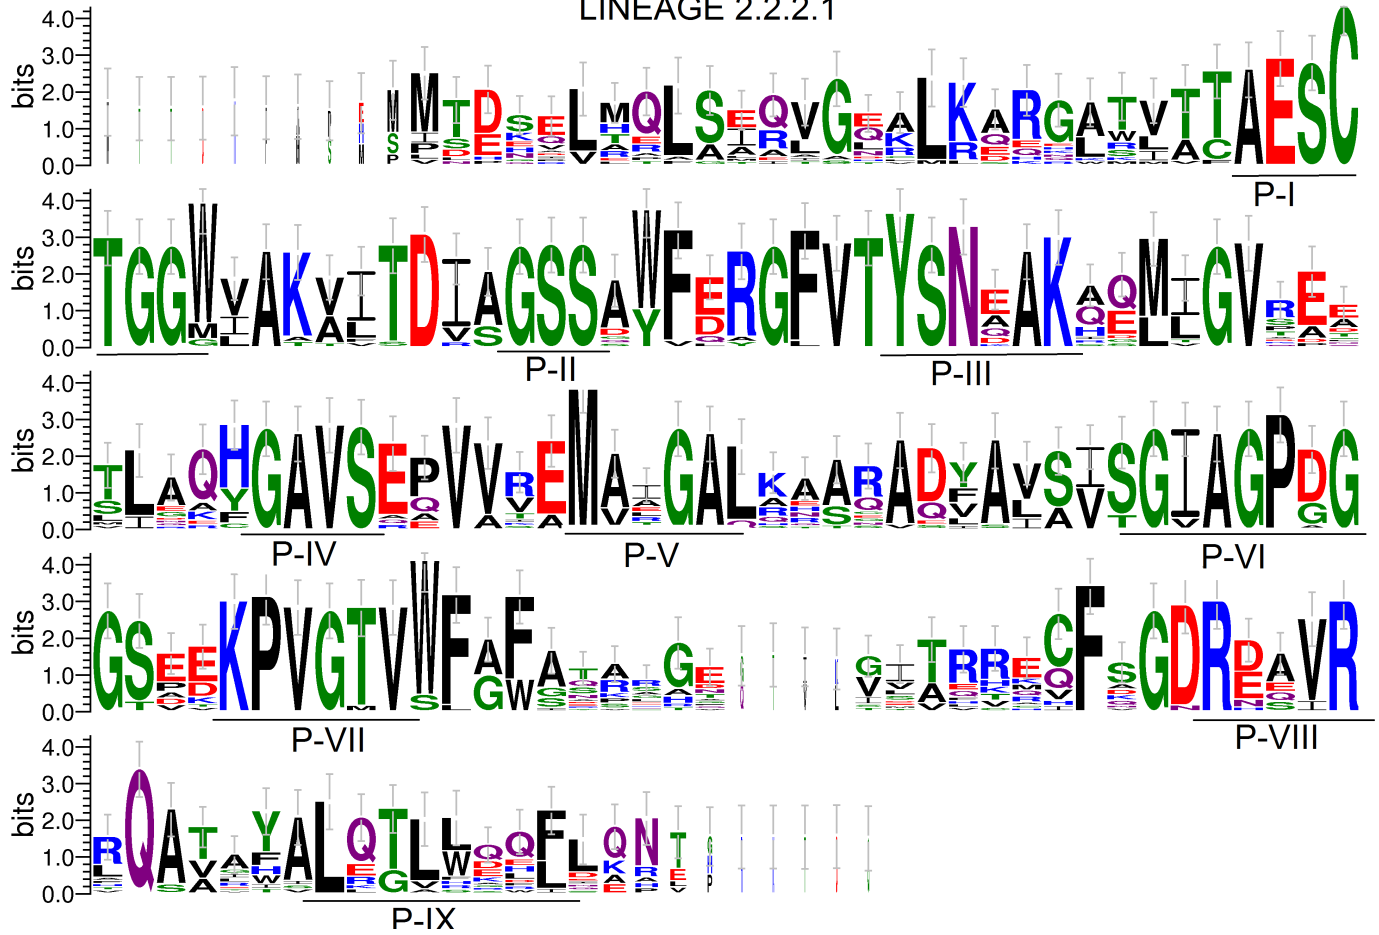

LINEAGE 2.2.2.2

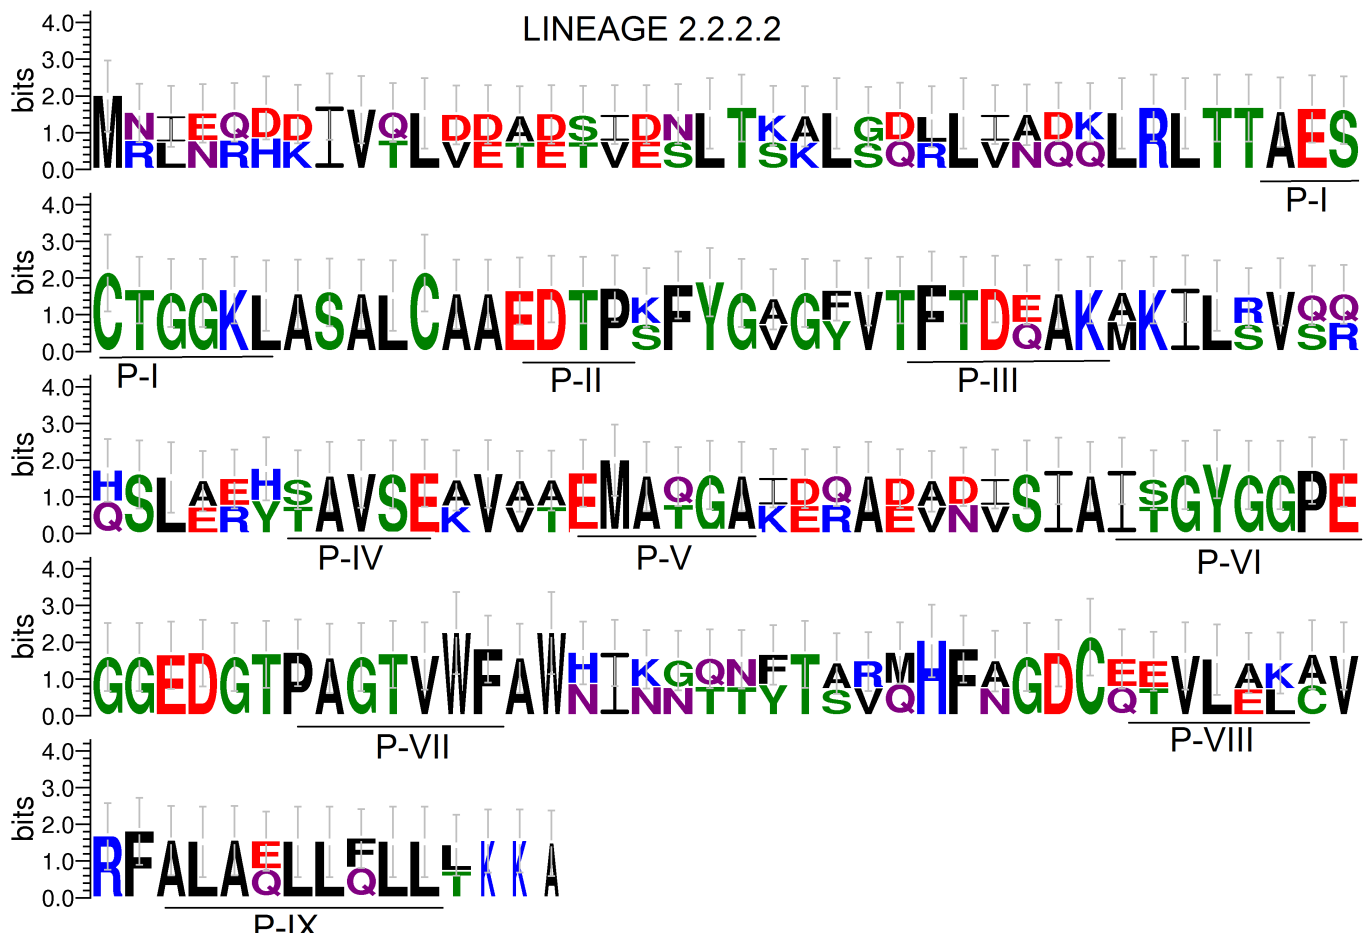



LINEAGE 2.2.2.3

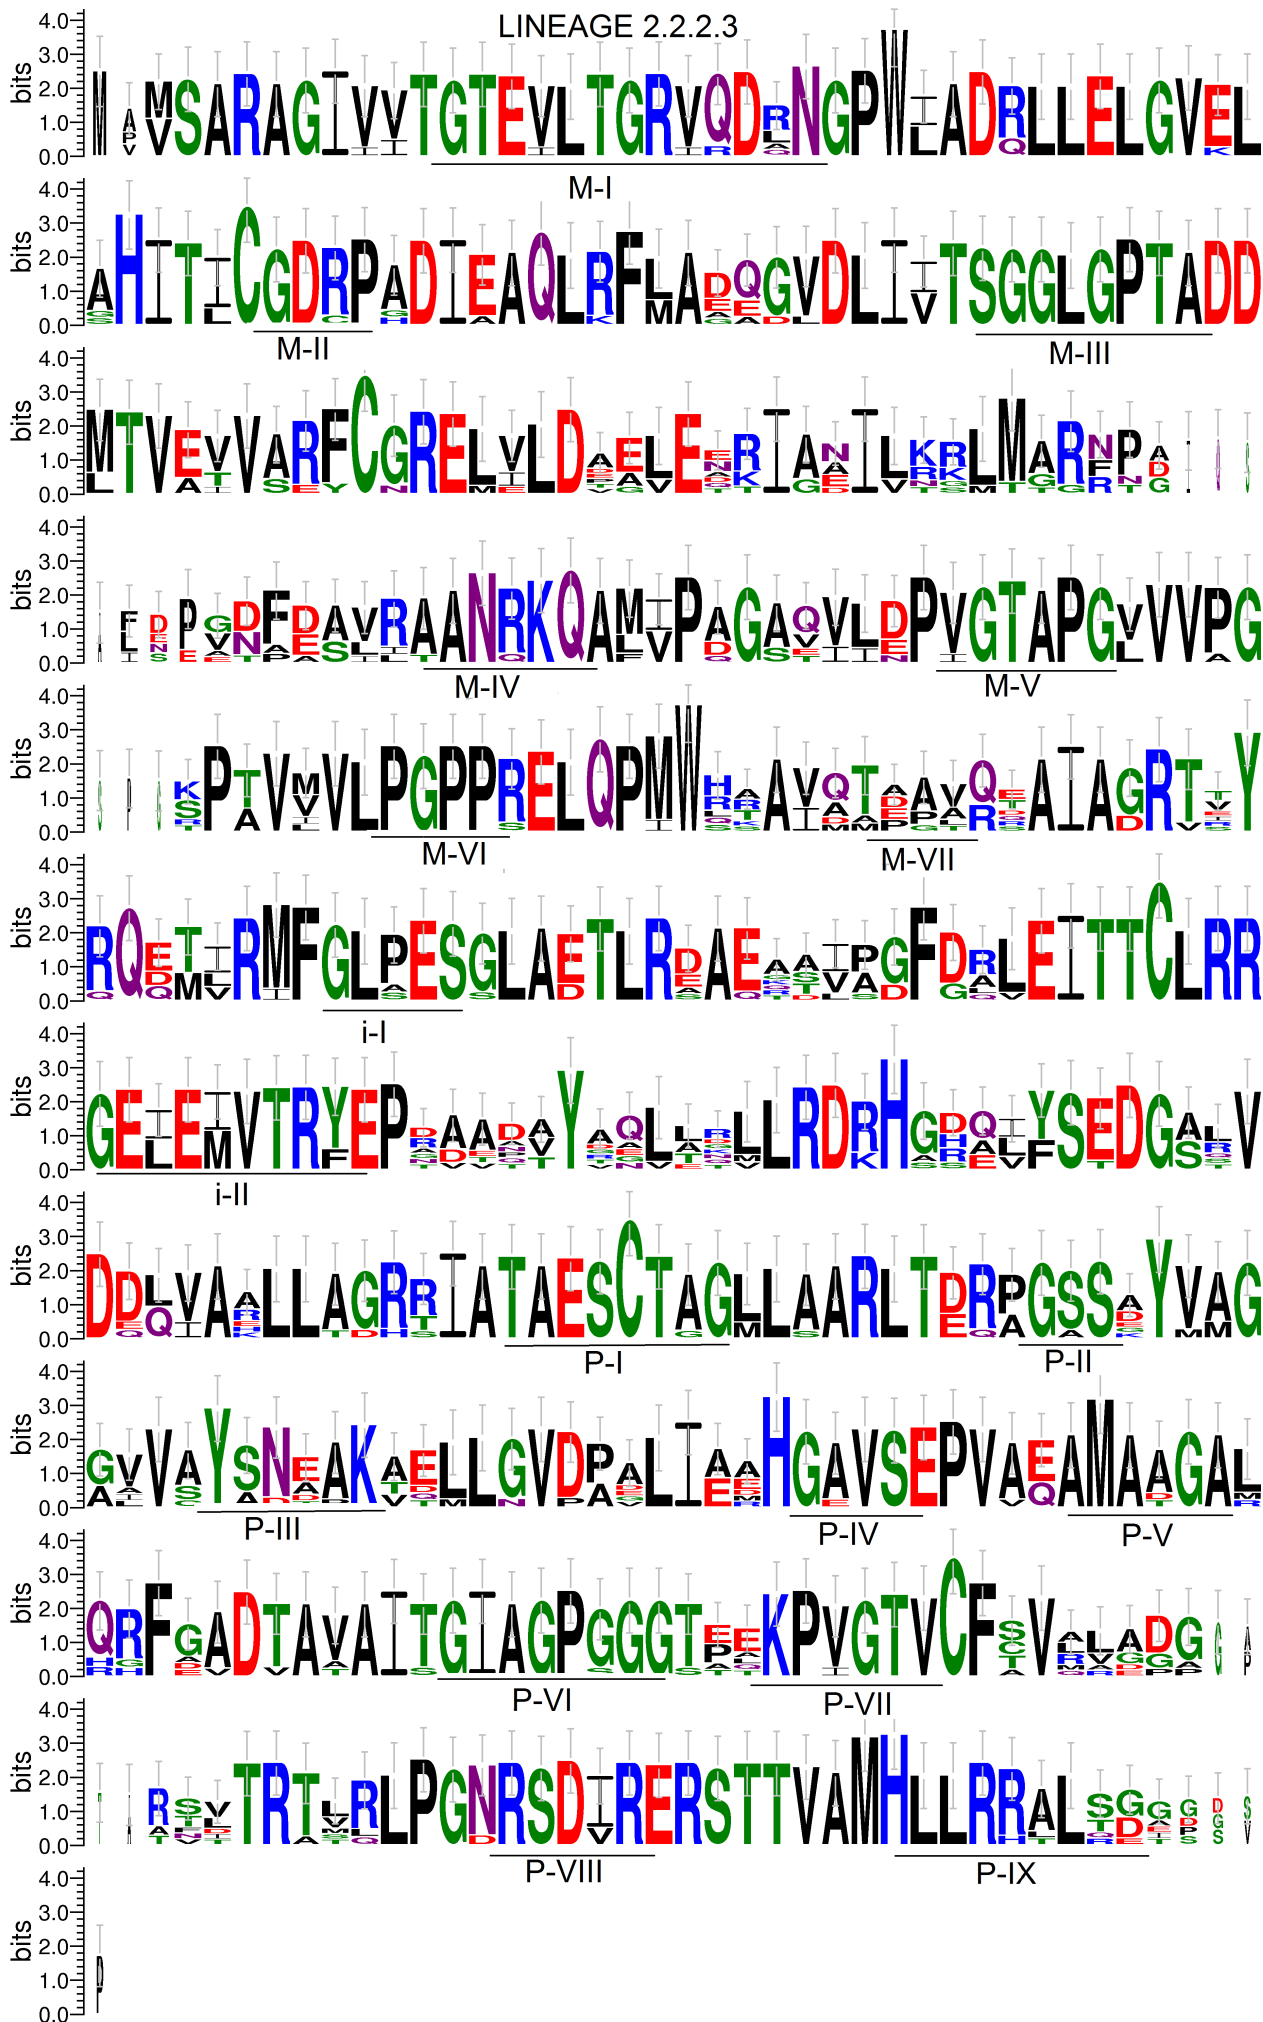

LINEAGE 2.2.3.1

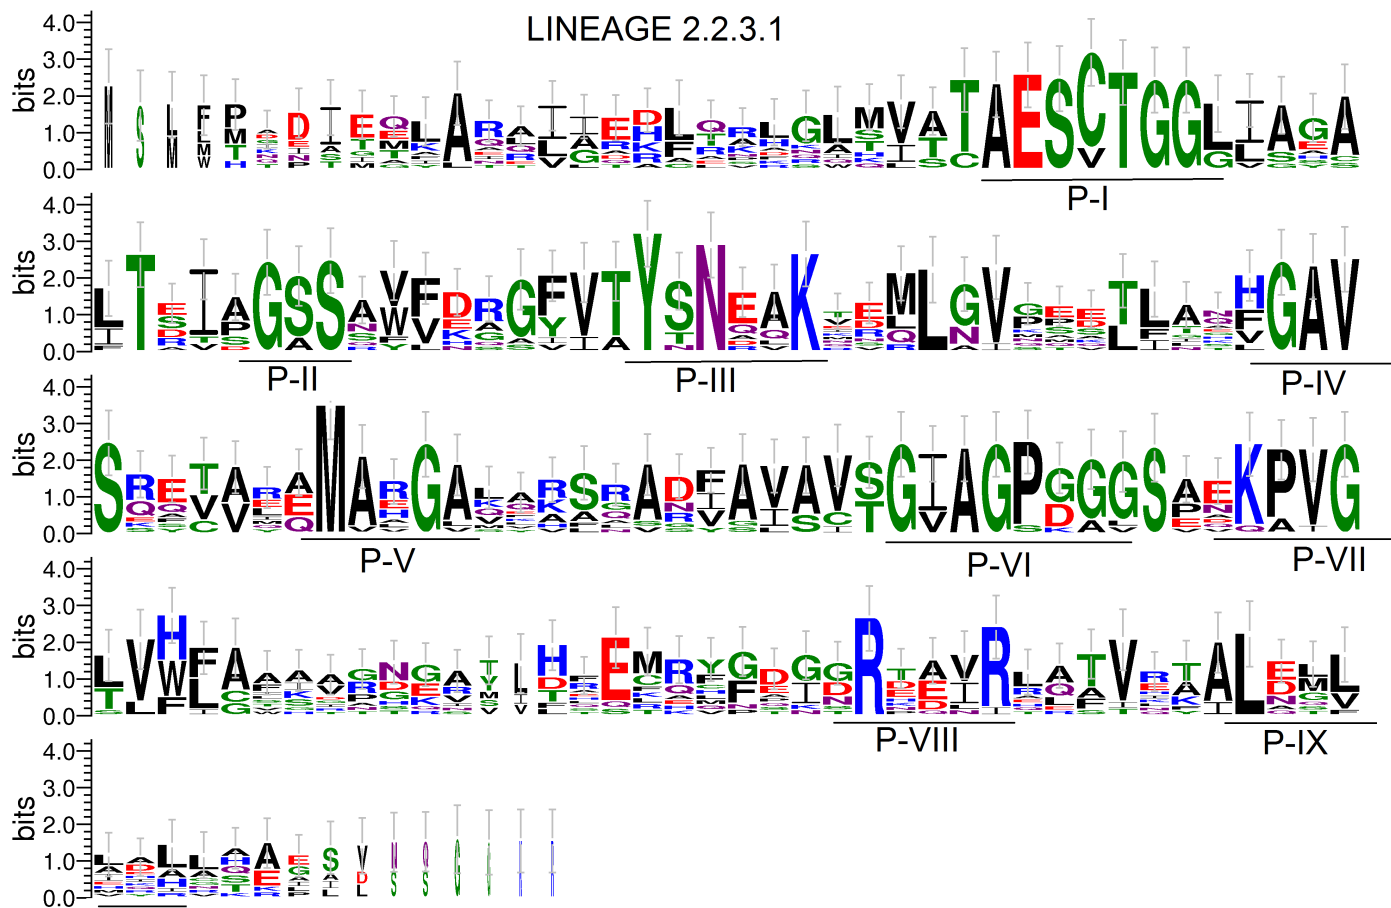

LINEAGE 2.2.3.2

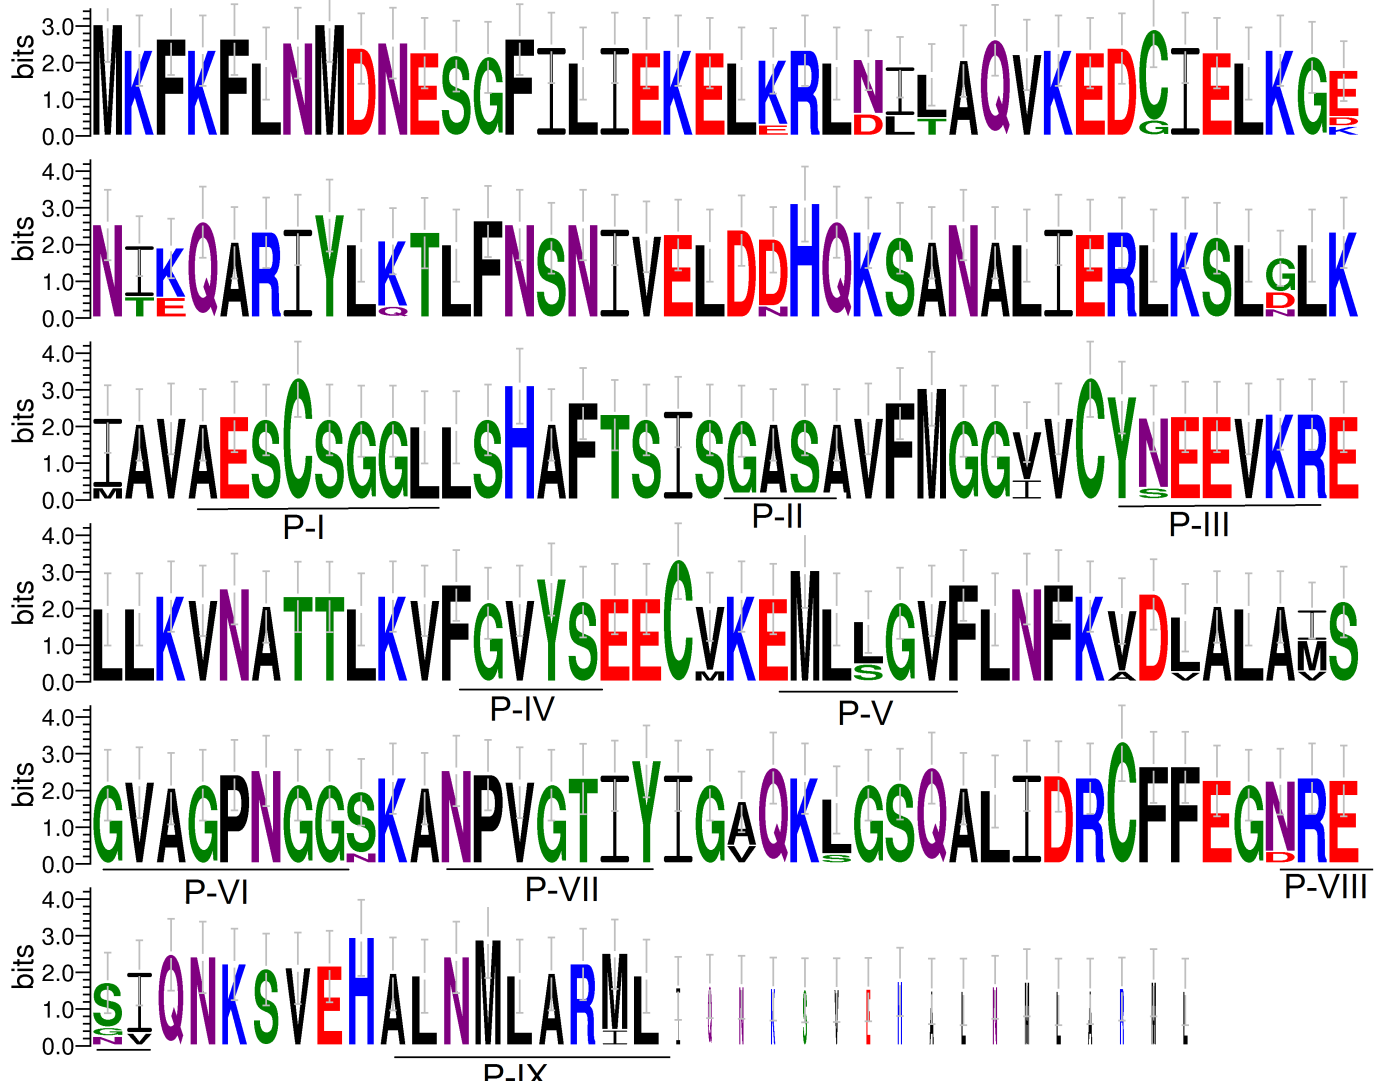

LINEAGE 2.2.3.3

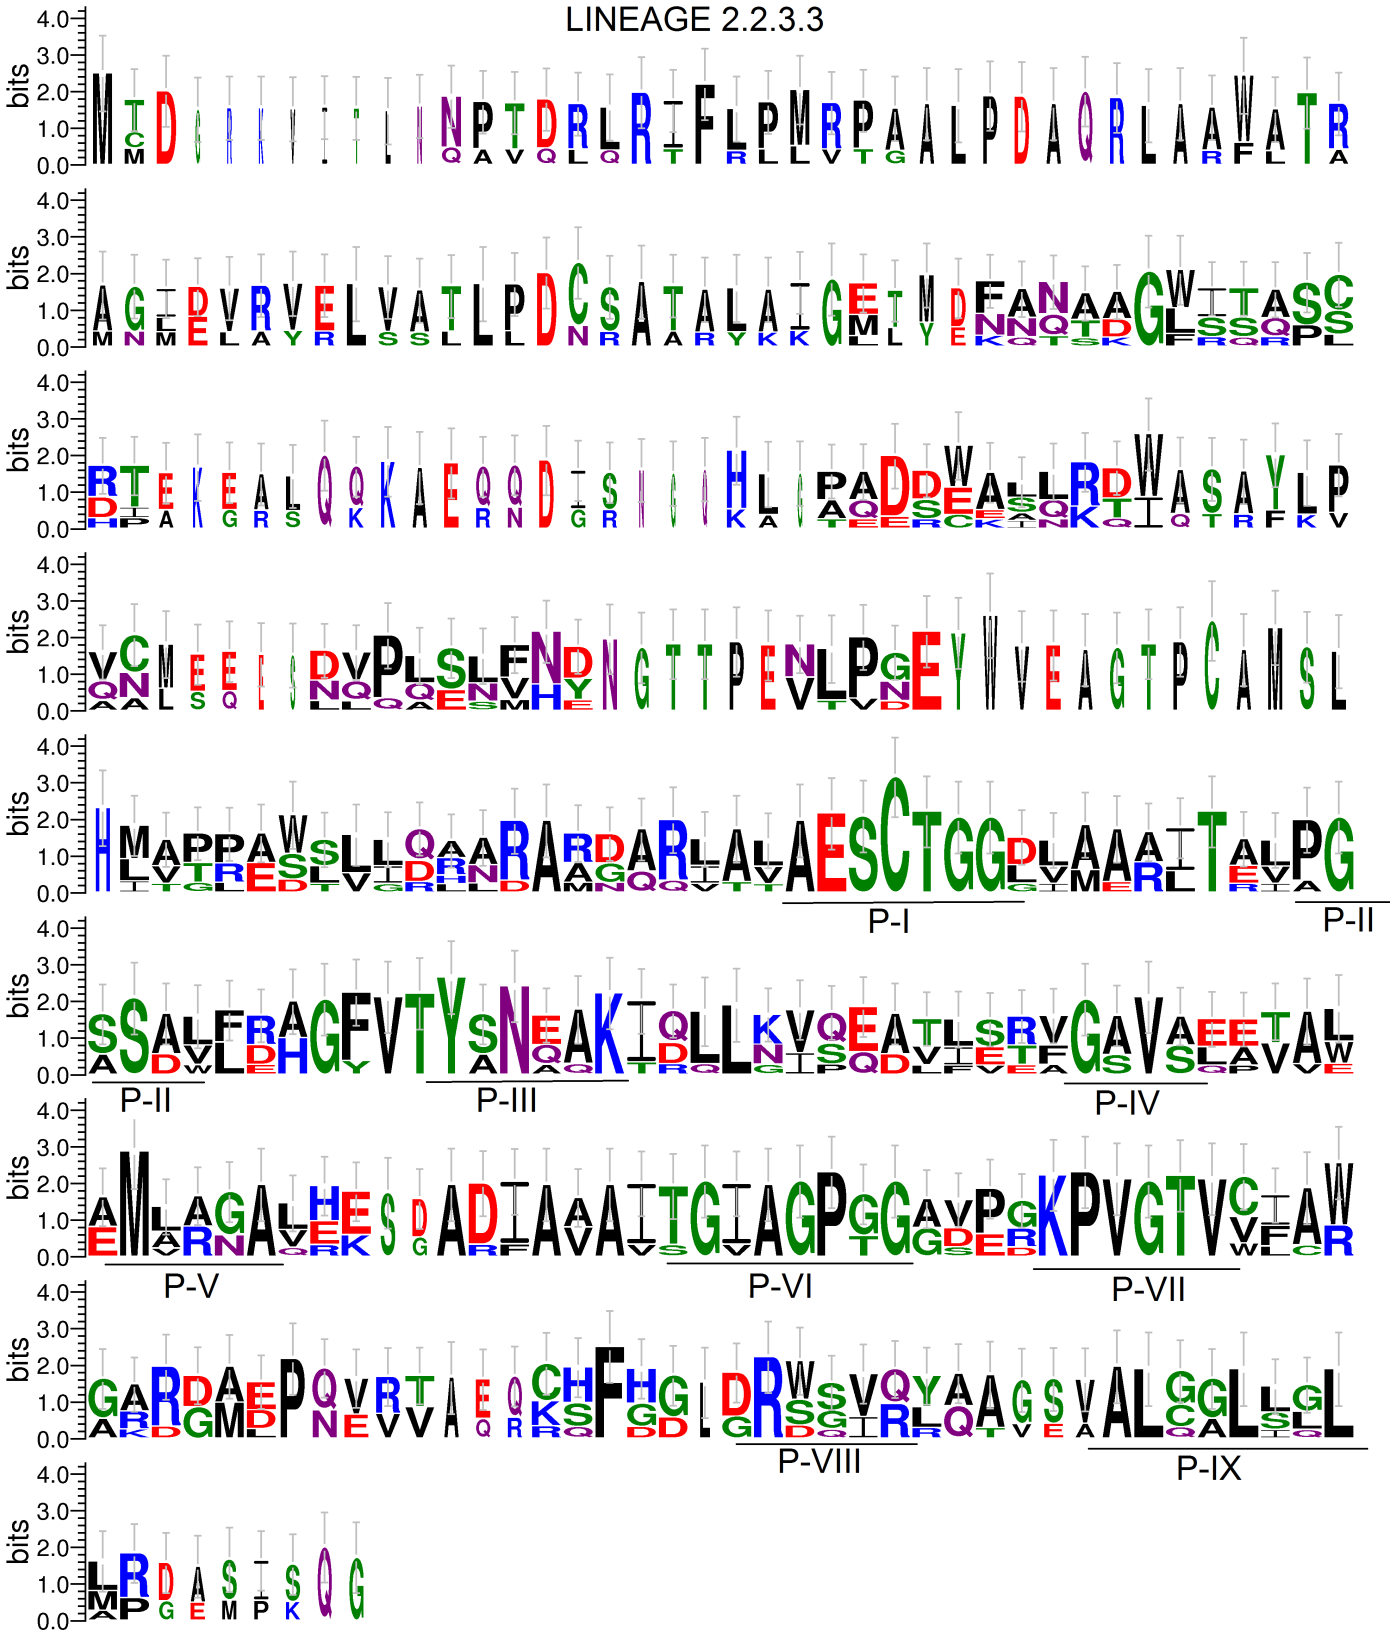

LINEAGE 2.2.3.4

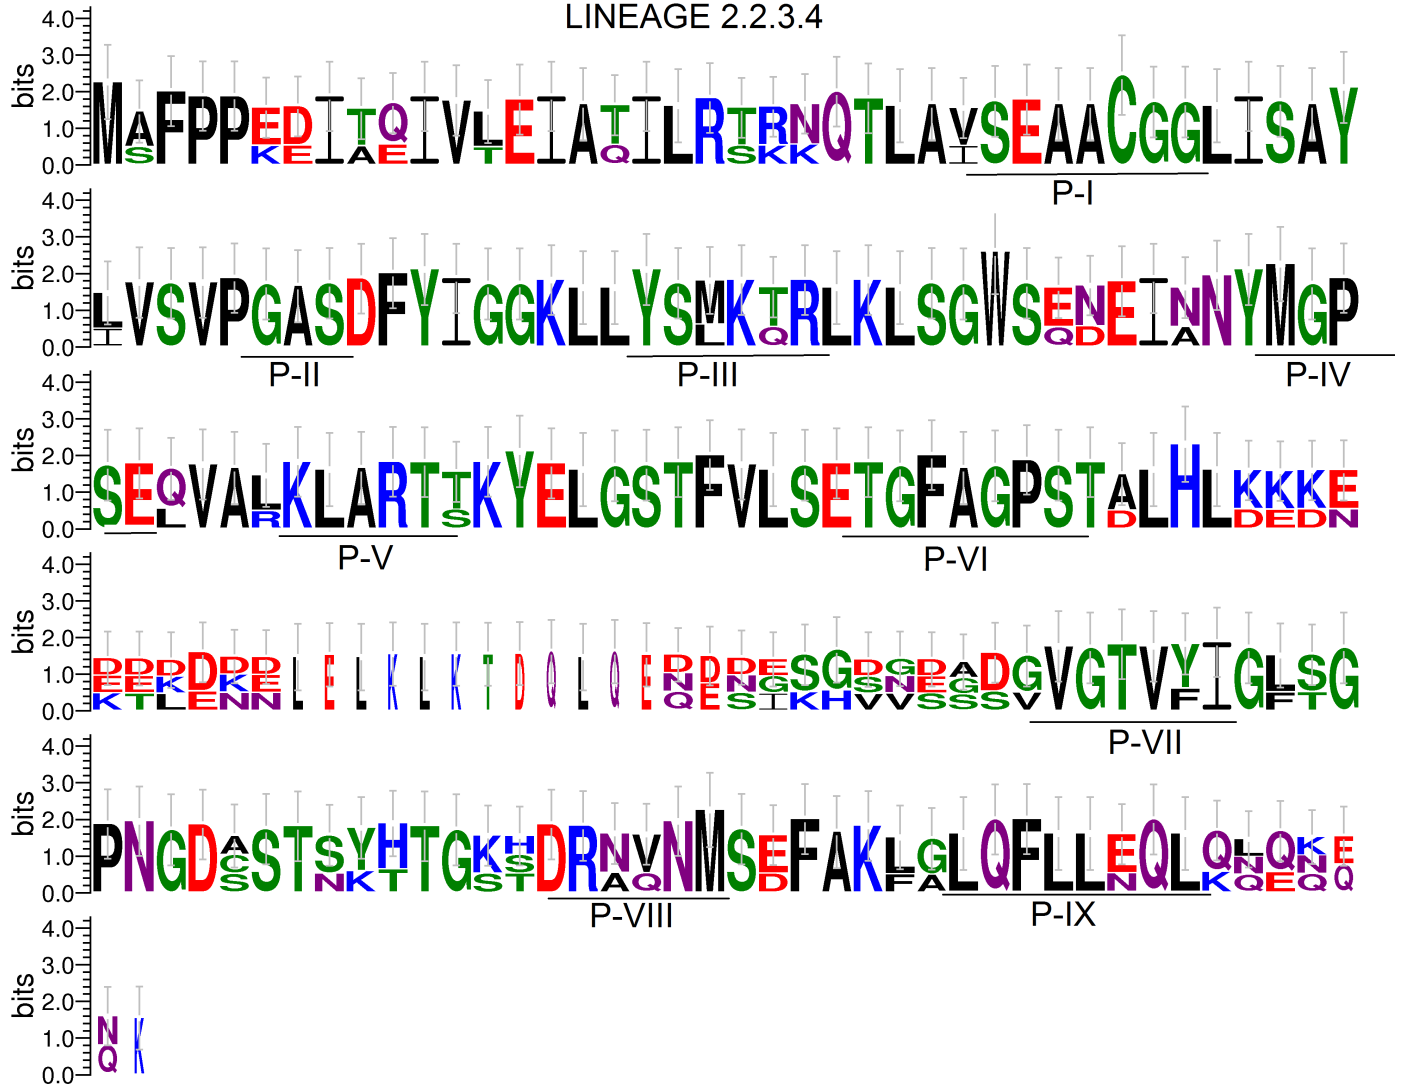

Supplement: pone.0082705.s008.pdf [file pone.0082705.s008.pdf]
