# Supplementary material for: New Insights into the Phylogeny and Molecular Classification of Nicotinamide Mononucleotide Deamidases
Source: PubMed Central journal article supplement (PMC3855486; doi:10.1371/journal.pone.0082705), 2013-12-05
Supplement: pone.0082705.s009.pdf [file pone.0082705.s009.pdf]

|         |                     |                                                      |                |
|---------|---------------------|------------------------------------------------------|----------------|
| C1F6H5  | <b>CINAL ACIC5</b>  | Acidobacterium capsulatum (strain ATCC 51196)        | Acidobacteria  |
| Q1IPQ9  | <b>CINAL KORVE</b>  | Koribacter versatilis (strain Ellin345)              | Acidobacteria  |
| Q028J4  | <b>CINAL SOLUE</b>  | Solibacter usitatus (strain Ellin6076)               | Acidobacteria  |
| A0LV09  | <b>CINAL ACIC1</b>  | Acidothermus cellulolyticus (strain ATCC 43068)      | Actinobacteria |
| Q2J752  | <b>CINAL FRASC</b>  | Frankia sp. (strain Ccl3)                            | Actinobacteria |
| C1API1  | <b>CINAL MYCBT</b>  | Mycobacterium bovis (strain BCG)                     | Actinobacteria |
| A4TAK5  | <b>CINAL MYCGI</b>  | Mycobacterium gilvum (strain PYR-GCK)                | Actinobacteria |
| Q9X7D6  | <b>CINAL MYCLE</b>  | Mycobacterium leprae (strain TN)                     | Actinobacteria |
| B2HDA1  | <b>CINAL MYCMM</b>  | Mycobacterium marinum (strain ATCC BAA-535)          | Actinobacteria |
| Q73ZH8  | <b>CINAL MYCPA</b>  | Mycobacterium paratuberculosis (strain ATCC BAA-968) | Actinobacteria |
| A0QY28  | <b>CINAL MYCS2</b>  | Mycobacterium smegmatis (strain ATCC 700084)         | Actinobacteria |
| A3Q040  | <b>CINAL MYCSJ</b>  | Mycobacterium sp. (strain JLS)                       | Actinobacteria |
| A1T9F4  | <b>CINAL MYCVP</b>  | Mycobacterium vanbaalenii (strain DSM 7251)          | Actinobacteria |
| Q1AT03  | <b>CINAL RUBXD</b>  | Rubrobacter xylanophilus (strain DSM 9941)           | Actinobacteria |
| D9UE64  | <b>D9UE64 9ACTO</b> | Streptomyces sp. SPB78                               | Actinobacteria |
| B2V6Y9  | <b>CINAL SULSY</b>  | Sulfurihydrogenibium sp. (strain YO3AOP1)            | Aquificae      |
| Q9YAF9  | <b>Y1980 AERPE</b>  | Aeropyrum pernix (strain ATCC 700893)                | Archaea        |
| A8ME30  | <b>Y1209 CALMQ</b>  | Caldivirga maquilingensis (strain ATCC 700844)       | Archaea        |
| Q8ZYA5  | <b>Y875 PYRAE</b>   | Pyrobaculum aerophilum (strain ATCC 51768)           | Archaea        |
| A4WH44  | <b>Y096 PYRAR</b>   | Pyrobaculum arsenaticum (strain DSM 13514)           | Archaea        |
| A3MS85  | <b>Y062 PYRCJ</b>   | Pyrobaculum calidifontis (strain JCM 11548)          | Archaea        |
| Q9UYB5  | <b>Y1593 PYRAB</b>  | Pyrococcus abyssi (strain GE5)                       | Archaea        |
| Q8U3J0  | <b>Y476 PYRFU</b>   | Pyrococcus furiosus (strain ATCC 43587)              | Archaea        |
| O58186  | <b>Y439 PYRHO</b>   | Pyrococcus horikoshii (strain ATCC 700860)           | Archaea        |
| Q5JJB4  | <b>Y1472 PYRKO</b>  | Pyrococcus kodakaraensis (strain ATCC BAA-918)       | Archaea        |
| C4KJ66  | <b>Y2028 SULIK</b>  | Sulfolobus islandicus (strain M.16.4)                | Archaea        |
| P95958  | <b>Y103 SULSO</b>   | Sulfolobus solfataricus (strain ATCC 35092)          | Archaea        |
| Q971E0  | <b>Y1413 SULTO</b>  | Sulfolobus tokodaii (strain DSM 16993)               | Archaea        |
| Q9HKV6  | <b>Y487 THEAC</b>   | Thermoplasma acidophilum (strain ATCC 25905)         | Archaea        |
| Q97B73  | <b>Y584 THEVO</b>   | Thermoplasma volcanium (strain ATCC 51530)           | Archaea        |
| B3ER86  | <b>CINAL AMOA5</b>  | Amoebophilus asiaticus (strain 5a2)                  | Bacteroidetes  |
| Q5LCF4  | <b>CINAL BACFN</b>  | Bacteroides fragilis (strain ATCC 25285)             | Bacteroidetes  |
| Q11S34  | <b>CINAL CYTH3</b>  | Cytophaga hutchinsonii (strain ATCC 33406)           | Bacteroidetes  |
| A5F9Y3  | <b>CINAL FLAJ1</b>  | Flavobacterium johnsoniae (strain ATCC 17061)        | Bacteroidetes  |
| A6GZ17  | <b>CINAL FLAPJ</b>  | Flavobacterium psychrophilum (strain JIP02)          | Bacteroidetes  |
| A0M3L5  | <b>CINAL GRAFK</b>  | Gramella forsetii (strain KT0803)                    | Bacteroidetes  |
| Q2S304  | <b>CINAL SALRD</b>  | Salinibacter ruber (strain DSM 13855)                | Bacteroidetes  |
| B3QL60  | <b>CINAL CHLP8</b>  | Chlorobaculum parvum (strain NCIB 8327)              | Chlorobi       |
| CQ3AUA4 | <b>CINAL CHLCH</b>  | Chlorobium chlorochromatii (strain CaD3)             | Chlorobi       |
| B3EHJ0  | <b>CINAL CHLL2</b>  | Chlorobium limicola (strain DSM 245)                 | Chlorobi       |
| B3EL42  | <b>CINAL CHLPB</b>  | Chlorobium phaeobacteroides (strain BS1)             | Chlorobi       |
| A1BJF2  | <b>CINAL CHLPD</b>  | Chlorobium phaeobacteroides (strain DSM 266)         | Chlorobi       |
| Q8KAX2  | <b>CINAL CHLTE</b>  | Chlorobium tepidum (strain ATCC 49652)               | chlorobi       |
| B3QTC8  | <b>CINAL CHLT3</b>  | Chloroherpeton thalassium (strain ATCC 35110)        | Chlorobi       |
| Q3B1F7  | <b>CINAL PELLD</b>  | Pelodictyon luteolum (strain DSM 273)                | Chlorobi       |
| A4SGM6  | <b>CINAL PROVI</b>  | Prosthecochloris vibrioformis (strain DSM 265)       | Chlorobi       |
| A9WJE6  | <b>A9WJE6 CHLAA</b> | Chloroflexus aurantiacus (strain ATCC 29366)         | Chloroflexi    |
| B9L1M7  | <b>CINAL THERP</b>  | Thermomicrobium roseum (strain ATCC 27502)           | Chloroflexi    |
| B0CEJ2  | <b>CINAL ACAM1</b>  | Acaryochloris marina (strain MBIC 11017)             | Cyanobacteria  |
| Q3MBD6  | <b>CINAL ANAVT</b>  | Anabaena variabilis (strain ATCC 29413)              | Cyanobacteria  |

|         |                     |                                                           |                      |
|---------|---------------------|-----------------------------------------------------------|----------------------|
| B1WSM0  | <b>CINAL CYAA5</b>  | Cyanothece sp. (strain ATCC 51142)                        | Cyanobacteria        |
| B7KFE8  | <b>CINAL CYAP7</b>  | Cyanothece sp. (strain PCC 7424)                          | Cyanobacteria        |
| B8HR57  | <b>CINAL CYAP4</b>  | Cyanothece sp. (strain PCC 7425)                          | Cyanobacteria        |
| B7JYM6  | <b>CINAL CYAP8</b>  | Cyanothece sp. (strain PCC 8801)                          | Cyanobacteria        |
| Q7NHU4  | <b>CINAL GLOVI</b>  | Gloeobacter violaceus (strain PCC 7421)                   | Cyanobacteria        |
| B0JVG7  | <b>CINAL MICAN</b>  | Microcystis aeruginosa (strain NIES-843)                  | Cyanobacteria        |
| B2J2A3  | <b>CINAL NOSP7</b>  | Nostoc punctiforme (strain ATCC 29133)                    | Cyanobacteria        |
| Q8YMW6  | <b>CINAL NOSS1</b>  | Nostoc sp. (strain PCC 7120)                              | Cyanobacteria        |
| CA2BP56 | <b>CINAL PROMS</b>  | Prochlorococcus marinus (strain AS9601)                   | Cyanobacteria        |
| A8G2R7  | <b>CINAL PROM2</b>  | Prochlorococcus marinus (strain MIT 9215)                 | Cyanobacteria        |
| A3PAX8  | <b>CINAL PROM0</b>  | Prochlorococcus marinus (strain MIT 9301)                 | Cyanobacteria        |
| Q31CS5  | <b>CINAL PROM9</b>  | Prochlorococcus marinus (strain MIT 9312)                 | Cyanobacteria        |
| Q7TUN0  | <b>CINAL PROMM</b>  | Prochlorococcus marinus (strain MIT 9313)                 | Cyanobacteria        |
| CA2BUN8 | <b>CINAL PROM5</b>  | Prochlorococcus marinus (strain MIT 9515)                 | Cyanobacteria        |
| A2C089  | <b>CINAL PROM1</b>  | Prochlorococcus marinus (strain NATL1A)                   | Cyanobacteria        |
| Q7VDS9  | <b>CINAL PROMA</b>  | Prochlorococcus marinus (strain SARG)                     | Cyanobacteria        |
| Q7TUG2  | <b>CINAL PROMP</b>  | Prochlorococcus marinus subsp. pastoris (strain CCMP1986) | Cyanobacteria        |
| Q5N2P7  | <b>CINAL SYNTP6</b> | Synechococcus sp. (strain ATCC 27144)                     | Cyanobacteria        |
| B1XKM7  | <b>CINAL SYNTP2</b> | Synechococcus sp. (strain ATCC 27264)                     | Cyanobacteria        |
| Q3AN01  | <b>CINAL SYNCS</b>  | Synechococcus sp. (strain CC9605)                         | Cyanobacteria        |
| Q3AW20  | <b>CINAL SYNCS9</b> | Synechococcus sp. (strain CC9902)                         | Cyanobacteria        |
| A5GWH4  | <b>CINAL SYNRS3</b> | Synechococcus sp. (strain RCC307)                         | Cyanobacteria        |
| A5GIG6  | <b>CINAL SYNTPW</b> | Synechococcus sp. (strain WH7803)                         | Cyanobacteria        |
| Q7U9J5  | <b>CINAL SYNTPX</b> | Synechococcus sp. (strain WH8102)                         | Cyanobacteria        |
| Q55760  | <b>CINAL SYNYS3</b> | Synechocystis sp. (strain PCC 6803)                       | Cyanobacteria        |
| Q8DH31  | <b>CINAL THEEB</b>  | Thermosynechococcus elongatus (strain BP-1)               | Cyanobacteria        |
| Q111G9  | <b>CINAL TRIEI</b>  | Trichodesmium erythraeum (strain IMS101)                  | Cyanobacteria        |
| C1CXY3  | <b>CINAL DEIDV</b>  | Deinococcus deserti (strain VCD115)                       | Deinococcus-Thermus  |
| Q1IWF4  | <b>CINAL DEIGD</b>  | Deinococcus geothermalis (strain DSM 11300)               | Deinococcus-Thermus  |
| CINAL   | <b>CINAL DEIRA</b>  | Deinococcus radiodurans (strain ATCC 13939)               | Deinococcus-Thermus  |
| O32508  | <b>CINAL DEIRA2</b> | Deinococcus radiodurans (strain ATCC 13939)               | Deinococcus-Thermus  |
| B5YB52  | <b>CINAL DICT6</b>  | Dictyoglomus thermophilum (strain ATCC 35947)             | Dictyoglomi          |
| B8DYM0  | <b>CINAL DICTD</b>  | Dictyoglomus turgidum (strain Z-1310)                     | Dictyoglomi          |
| B1GZ34  | <b>CINAL UNCTG</b>  | Uncultured termite group 1 bacterium phylotype Rs-D17     | Environmental sample |
| Q59VN7  | <b>Q59VN7 CANAL</b> | Candida albicans (strain SC5314)                          | Eukaryota Fungi      |
| B9W7J7  | <b>B9W7J7 CANDC</b> | Candida dubliniensis (strain CD36)                        | Eukaryota Fungi      |
| A5DWE6  | <b>A5DWE6 LODEL</b> | Lodderomyces elongisporus (strain ATCC 11503)             | Eukaryota Fungi      |
| A6TNW2  | <b>CINA ALKMQ</b>   | Alkaliphilus metalliredigens (strain QYMF)                | Firmicutes           |
| A8MI49  | <b>CINA ALKOO</b>   | Alkaliphilus oremlandii (strain OhILAs)                   | Firmicutes           |
| B7GJN4  | <b>CINA ANOFW</b>   | Anoxybacillus flavithermus (strain DSM 21510)             | Firmicutes           |
| A7Z4W4  | <b>CINA BACA2</b>   | Bacillus amyloliquefaciens (strain FZB42)                 | Firmicutes           |
| B7HDQ5  | <b>CINA BACC4</b>   | Bacillus cereus (strain B4264)                            | Firmicutes           |
| B7ITN2  | <b>CINA BACC2</b>   | Bacillus cereus (strain G9842)                            | Firmicutes           |
| A7GRB0  | <b>CINA BACCN</b>   | Bacillus cereus subsp. cytotoxis (strain NVH 391-98)      | Firmicutes           |
| Q5FWF9  | <b>CINA BACSK</b>   | Bacillus clausii (strain KSM-K16)                         | Firmicutes           |
| Q9KAA5  | <b>CINA BACHD</b>   | Bacillus halodurans (strain ATCC BAA-125)                 | Firmicutes           |
| Q65JF3  | <b>CINA BACLD</b>   | Bacillus licheniformis (strain DSM 13)                    | Firmicutes           |
| A8FDG2  | <b>CINA BACP2</b>   | Bacillus pumilus (strain SAFR-032)                        | Firmicutes           |
| P46323  | <b>CINA BACSU</b>   | Bacillus subtilis (strain 168)                            | Firmicutes           |
| Q6HF34  | <b>CINA BACHK</b>   | Bacillus thuringiensis subsp. konkukian (strain 97-27)    | Firmicutes           |

|         |                     |                                                          |            |
|---------|---------------------|----------------------------------------------------------|------------|
| A9VS24  | <b>CINA BACWK</b>   | Bacillus weihenstephanensis (strain KBAB4)               | Firmicutes |
| B9MQY2  | <b>CINA ANATD</b>   | Caldicellulosiruptor bescii (strain ATCC BAA-1888)       | Firmicutes |
| A4XLD7  | <b>CINA CALS8</b>   | Caldicellulosiruptor saccharolyticus (strain ATCC 43494) | Firmicutes |
| Q97D94  | <b>CINA CLOAB</b>   | Clostridium acetobutylicum (strain ATCC 824)             | Firmicutes |
| A6M320  | <b>CINA CLOB8</b>   | Clostridium beijerinckii (strain ATCC 51743)             | Firmicutes |
| B1KSY5  | <b>CINA CLOBM</b>   | Clostridium botulinum (strain Loch Maree)                | Firmicutes |
| A7G9W4  | <b>CINA CLOBL</b>   | Clostridium botulinum (strain Langeland)                 | Firmicutes |
| B8I7D0  | <b>CINA CLOCE</b>   | Clostridium cellulolyticum (strain ATCC 35319)           | Firmicutes |
| Q18BS8  | <b>CINA CLOD6</b>   | Clostridium difficile (strain 630)                       | Firmicutes |
| B9E6E0  | <b>CINA CLOK1</b>   | Clostridium kluyveri (strain NBRC 12016)                 | Firmicutes |
| A0PXD7  | <b>CINA CLONN</b>   | Clostridium novyi                                        | Firmicutes |
| Q0SWN5  | <b>CINA CLOPS</b>   | Clostridium perfringens (strain SM101)                   | Firmicutes |
| Q898T5  | <b>CINA CLOTE</b>   | Clostridium tetani (strain Massachusetts)                | Firmicutes |
| A3DEA5  | <b>CINA CLOTH</b>   | Clostridium thermocellum (strain ATCC 27405)             | Firmicutes |
| B1I313  | <b>CINA DESAP</b>   | Desulforudis audaxviator (strain MP104C)                 | Firmicutes |
| A4J5U0  | <b>CINA DESRM</b>   | Desulfotomaculum reducens (strain MI-1)                  | Firmicutes |
| Q82Z98  | <b>CINA ENTFA</b>   | Enterococcus faecalis (strain ATCC 700802)               | Firmicutes |
| B1YMB8  | <b>CINA EXIS2</b>   | Exiguobacterium sibiricum (strain DSM 17290)             | Firmicutes |
| B0S3U9  | <b>CINA FINM2</b>   | Finegoldia magna (strain ATCC 29328)                     | Firmicutes |
| Q5L0F7  | <b>CINA GEOKA</b>   | Geobacillus kaustophilus (strain HTA426)                 | Firmicutes |
| C5D9G1  | <b>CINA GEOSW</b>   | Geobacillus sp. (strain WCH70)                           | Firmicutes |
| 8CXC3   | <b>CINA HALOH</b>   | Halotheothrix orenii (strain H 168)                      | Firmicutes |
| Q03R28  | <b>CINA LACBA</b>   | Lactobacillus brevis (strain ATCC 367)                   | Firmicutes |
| B3WCM0  | <b>CINA LACCB</b>   | Lactobacillus casei (strain BL23)                        | Firmicutes |
| B2GB14  | <b>CINA LACF3</b>   | Lactobacillus fermentum (strain NBRC 3956)               | Firmicutes |
| Q88UZ3  | <b>CINA LACPL</b>   | Lactobacillus plantarum (strain ATCC BAA-793)            | Firmicutes |
| A5VIW6  | <b>CINA LACRD</b>   | Lactobacillus reuteri (strain DSM 20016)                 | Firmicutes |
| B1N0C1  | <b>CINA LEUCK</b>   | Leuconostoc citreum (strain KM20)                        | Firmicutes |
| Q92BV8  | <b>CINA LISIN</b>   | Listeria innocua serovar 6a (strain CLIP 11262)          | Firmicutes |
| Q71ZS3  | <b>CINA LISMF</b>   | Listeria monocytogenes serotype 4b (strain F2365)        | Firmicutes |
| A0AIJ9  | <b>CINA LISW6</b>   | Listeria welshimeri serovar 6b (strain ATCC 35897)       | Firmicutes |
| B1HR35  | <b>CINA LYSSC</b>   | Lysinibacillus sphaericus (strain C3-41)                 | Firmicutes |
| Q2RKI6  | <b>CINA MOOTA</b>   | Moorella thermoacetica (strain ATCC 39073)               | Firmicutes |
| B2A3C4  | <b>CINA NATTJ</b>   | Natranaerobius thermophilus (strain ATCC BAA-1301)       | Firmicutes |
| Q8EQR8  | <b>CINA OCEIH</b>   | Oceanobacillus iheyensis (strain DSM 14371)              | Firmicutes |
| Q03EQ4  | <b>CINA PEDPA</b>   | Pediococcus pentosaceus (strain ATCC 25745)              | Firmicutes |
| CA5D2R7 | <b>CINA PELTS</b>   | Pelotomaculum thermopropionicum (strain DSM 13744)       | Firmicutes |
| Q5HGE7  | <b>Q5HGE7 STAAC</b> | Staphylococcus aureus (strain COL)                       | Firmicutes |
| Q8E2R9  | <b>CINA STRA3</b>   | Streptococcus agalactiae serotype III (strain NEM316)    | Firmicutes |
| C0MGB7  | <b>CINA STRS7</b>   | Streptococcus equi subsp. zooepidemicus (strain H70)     | Firmicutes |
| A8AZT4  | <b>CINA STRGC</b>   | Streptococcus gordonii (strain Challis)                  | Firmicutes |
| Q8DRX2  | <b>CINA STRMU</b>   | Streptococcus mutans serotype c (strain ATCC 700610)     | Firmicutes |
| C1C9K9  | <b>CINA STRP7</b>   | Streptococcus pneumoniae (strain 70585)                  | Firmicutes |
| B5XJ05  | <b>CINA STRPZ</b>   | Streptococcus pyogenes serotype M49 (strain NZ131)       | Firmicutes |
| A4VYN4  | <b>CINA STRS2</b>   | Streptococcus suis (strain 98HAH33)                      | Firmicutes |
| B9WXF1  | <b>B9WXF1 STRSU</b> | Streptococcus suis 89/1591                               | Firmicutes |
| Q5M6H3  | <b>CINA STRT2</b>   | Streptococcus thermophilus (strain ATCC BAA-250)         | Firmicutes |
| B9DW66  | <b>CINA STRU0</b>   | Streptococcus uberis (strain ATCC BAA-854)               | Firmicutes |
| Q67NW5  | <b>CINA SYMTH</b>   | Symbiobacterium thermophilum (strain T)                  | Firmicutes |
| Q0AXI8  | <b>CINAL SYNS3</b>  | Syntrophomonas wolfei subsp. wolfei (strain Goettingen)  | Firmicutes |

|        |                     |                                                              |                  |
|--------|---------------------|--------------------------------------------------------------|------------------|
| Q0IDD6 | <b>CINAL SYNWW</b>  | Syntrophomonas wolfei subsp. wolfei (strain Goettingen)      | Firmicutes       |
| B0K9N3 | <b>CINA THEP3</b>   | Thermoanaerobacter pseudethanolicus (strain ATCC 33223)      | Firmicutes       |
| Q8RA54 | <b>CINA THETN</b>   | Thermoanaerobacter tengcongensis (strain DSM 15242)          | Firmicutes       |
| Q8RHR9 | <b>CINAL FUSNN</b>  | Fusobacterium nucleatum subsp. nucleatum (strain ATCC 25586) | Fusobacteria     |
| D1AL40 | <b>D1AL40 SEBTE</b> | Sebaldella termitidis (strain ATCC 33386)                    | Fusobacteria     |
| C1A7F4 | <b>CINAL GEMAT</b>  | Gemmatimonas aurantiaca (strain T-27)                        | Gemmatimonadetes |
| E6QAI2 | <b>E6QAI2 9ZZZ</b>  | mine drainage metagenome                                     | Metagenome       |
| D2R7K4 | <b>D2R7K4 PIRSD</b> | Pirellula staleyi (strain ATCC 27377)                        | Planctomycetes   |
| B7J7A7 | <b>B7J7A7 ACIF2</b> | Acidithiobacillus ferrooxidans (strain ATCC 23270)           | Proteobacteria   |
| B5EQ46 | <b>B5EQ46 ACIF5</b> | Acidithiobacillus ferrooxidans (strain ATCC 53993)           | Proteobacteria   |
| A9CJ26 | <b>CINA AGRT5</b>   | Agrobacterium tumefaciens (strain C58)                       | Proteobacteria   |
| D3RTT7 | <b>D3RTT7 ALLVD</b> | Allochromatium vinosum (strain ATCC 17899)                   | Proteobacteria   |
| B8J6V6 | <b>CINAL ANAD2</b>  | Anaeromyxobacter dehalogenans (strain 2CP-1)                 | Proteobacteria   |
| A7HGS8 | <b>CINAL ANADF</b>  | Anaeromyxobacter sp. (strain Fw109-5)                        | Proteobacteria   |
| A5ES77 | <b>A5ES77 BRASB</b> | Bradyrhizobium sp. (strain BTAi1)                            | Proteobacteria   |
| F4QYT4 | <b>F4QYT4 BREDI</b> | Brevundimonas diminuta ATCC 11568                            | Proteobacteria   |
| Q57D17 | <b>Q57D17 BRUAB</b> | Brucella abortus biovar 1 (strain 9-941)                     | Proteobacteria   |
| B1YSY9 | <b>B1YSY9 BUR44</b> | Burkholderia ambifaria (strain MC40-6)                       | Proteobacteria   |
| E8YFC1 | <b>E8YFC1 9BURK</b> | Burkholderia sp. CCGE1001                                    | Proteobacteria   |
| Q47XX0 | <b>CINAL COLP3</b>  | Colwellia psychrerythraea (strain 34H)                       | Proteobacteria   |
| C0QI20 | <b>CINAL DESAH</b>  | Desulfobacterium autotrophicum (strain ATCC 43914)           | Proteobacteria   |
| A8ZZX4 | <b>CINAL DESOH</b>  | Desulfococcus oleovorans (strain DSM 6200)                   | Proteobacteria   |
| Q6AIZ4 | <b>CINAL DESPS</b>  | Desulfotalea psychrophila (strain LSv54)                     | Proteobacteria   |
| B8J0U1 | <b>CINAL DESDA</b>  | Desulfovibrio desulfuricans (strain ATCC 27774)              | Proteobacteria   |
| D2BUH5 | <b>D2BUH5 DICD5</b> | Dickeya dadantii (strain Ech586)                             | Proteobacteria   |
| P51967 | <b>YGAD ENTAG</b>   | Enterobacter agglomerans (Erwinia herbicola)                 | Proteobacteria   |
| K4YRF4 | <b>K4YRF4 9ENTR</b> | Enterobacter sp. SST3                                        | Proteobacteria   |
| E5B2F5 | <b>E5B2F5 ERWAM</b> | Erwinia amylovora ATCC BAA-2158                              | Proteobacteria   |
| YFAY   | <b>YFAY ECOLI</b>   | Escherichia coli (strain K12)                                | Proteobacteria   |
| P0A6G3 | <b>YDEJ ECOLI</b>   | Escherichia coli (strain K12)                                | Proteobacteria   |
| YDEJ   | <b>YGAD ECOLI</b>   | Escherichia coli (strain K12)                                | Proteobacteria   |
| B1LLK3 | <b>CINAL ECOSM</b>  | Escherichia coli (strain SMS-3-5)                            | Proteobacteria   |
| I1B4U7 | <b>I1B4U7 ECOLX</b> | Escherichia coli AI27                                        | Proteobacteria   |
| B5ED03 | <b>CINAL GEOBB</b>  | Geobacter bemidjiensis (strain Bem)                          | Proteobacteria   |
| Q39Z82 | <b>CINAL GEOMG</b>  | Geobacter metallireducens (strain GS-15)                     | Proteobacteria   |
| B9M363 | <b>CINAL GEOSF</b>  | Geobacter sp. (strain FRC-32)                                | Proteobacteria   |
| C6E6X4 | <b>CINAL GEOSM</b>  | Geobacter sp. (strain M21)                                   | Proteobacteria   |
| Q74GV1 | <b>CINAL GEOSL</b>  | Geobacter sulfurreducens (strain ATCC 51573)                 | Proteobacteria   |
| A5GDB4 | <b>CINAL GEOUR</b>  | Geobacter uraniireducens (strain Rf4)                        | Proteobacteria   |
| O25606 | <b>O25606 HELPY</b> | Helicobacter pylori (strain ATCC 700392)                     | Proteobacteria   |
| C7BZK4 | <b>C7BZK4 HELPB</b> | Helicobacter pylori (strain B38)                             | Proteobacteria   |
| Q1CSR9 | <b>Q1CSR9 HELPH</b> | Helicobacter pylori (strain HPAG1)                           | Proteobacteria   |
| E1Q2T3 | <b>E1Q2T3 HELPP</b> | Helicobacter pylori (strain PeCan4)                          | Proteobacteria   |
| E1Q060 | <b>E1Q060 HELPM</b> | Helicobacter pylori (strain SJM180)                          | Proteobacteria   |
| D6XQJ5 | <b>D6XQJ5 HELPV</b> | Helicobacter pylori (strain v225d)                           | Proteobacteria   |
| B9XV77 | <b>B9XV77 HELPX</b> | Helicobacter pylori 98-10                                    | Proteobacteria   |
| F9U1V6 | <b>F9U1V6 MARPU</b> | Marichromatium purpuratum 984                                | Proteobacteria   |
| A6EV18 | <b>A6EV18 9ALTE</b> | Marinobacter algicola DG893                                  | Proteobacteria   |
| Q1DCC8 | <b>CINAL MYXXD</b>  | Myxococcus xanthus (strain DK 1622)                          | Proteobacteria   |
| F9EYU4 | <b>F9EYU4 9NEIS</b> | Neisseria macacae ATCC 33926                                 | Proteobacteria   |

|        |                     |                                                                  |                |
|--------|---------------------|------------------------------------------------------------------|----------------|
| D5BZJ2 | <b>D5BZJ2 NITHN</b> | Nitrosococcus halophilus (strain Nc4)                            | Proteobacteria |
| G9ALV0 | <b>G9ALV0 PANAN</b> | Pantoea ananatis LMG 5342                                        | Proteobacteria |
| Q3A1W5 | <b>CINAL PELCD</b>  | Pelobacter carbinolicus (strain DSM 2380)                        | Proteobacteria |
| A1ALN8 | <b>CINAL PELPD</b>  | Pelobacter propionicus strain DSM 2379                           | Proteobacteria |
| Q6LPD0 | <b>Q6LPD0 PHOPR</b> | Photobacterium profundum (Photobacterium sp. (strain SS9))       | Proteobacteria |
| C7BHV9 | <b>C7BHV9 PHOAA</b> | Photorhabdus asymbiotica subsp. asymbiotica (strain ATCC 43949)  | Proteobacteria |
| K1GRG5 | <b>K1GRG5 PROMI</b> | Proteus mirabilis WGLW4                                          | Proteobacteria |
| D4C4M2 | <b>D4C4M2 PRORE</b> | Providencia rettgeri DSM 1131                                    | Proteobacteria |
| Q15QS0 | <b>Q15QS0 PSEA6</b> | Pseudoalteromonas atlantica (strain T6c)                         | Proteobacteria |
| I4K772 | <b>I4K772 PSEFL</b> | Pseudomonas fluorescens SS101                                    | Proteobacteria |
| P72227 | <b>YGAD PSEPU</b>   | Pseudomonas putida                                               | Proteobacteria |
| Q48F93 | <b>Q48F93 PSE14</b> | Pseudomonas syringae pv. phaseolicola (strain 1448A)             | Proteobacteria |
| H2IVB2 | <b>H2IVB2 RAHAC</b> | Rahnella aquatilis (strain ATCC 33071)                           | Proteobacteria |
| K5DXI3 | <b>K5DXI3 RHILU</b> | Rhizobium lupini HPC(L)                                          | Proteobacteria |
| D0ZPN9 | <b>D0ZPN9 SALT1</b> | Salmonella typhimurium (strain 14028s)                           | Proteobacteria |
| D0ZUV6 | <b>D0ZUV6 SALT1</b> | Salmonella typhimurium (strain 14028s)                           | Proteobacteria |
| Q8ZPI7 | <b>Q8ZPI7 SALT1</b> | Salmonella typhimurium (strain LT2)                              | Proteobacteria |
| G0B7Z5 | <b>G0B7Z5 SERSA</b> | Serratia plymuthica (strain AS9)                                 | Proteobacteria |
| A1S257 | <b>CINAL SHEAM</b>  | Shewanella amazonensis                                           | Proteobacteria |
| A6WTS6 | <b>CINAL SHEB8</b>  | Shewanella baltica (strain OS185)                                | Proteobacteria |
| Q12SN4 | <b>CINAL SHEDO</b>  | Shewanella denitrificans (strain OS217)                          | Proteobacteria |
| Q089L6 | <b>CINAL SHEFN</b>  | Shewanella frigidimarina (strain NCIMB 400)                      | Proteobacteria |
| B0TL92 | <b>CINAL SHEHH</b>  | Shewanella halifaxensis (strain HAW-EB4)                         | Proteobacteria |
| A3Q9C2 | <b>CINAL SHEL P</b> | Shewanella loihica (strain ATCC BAA-1088)                        | Proteobacteria |
| Q8EK32 | <b>CINAL SHEON</b>  | Shewanella oneidensis (strain MR-1)                              | Proteobacteria |
| A8GZ14 | <b>CINAL SHEPA</b>  | Shewanella pealeana (strain ATCC 700345)                         | Proteobacteria |
| B8CNH3 | <b>CINAL SHEPW</b>  | Shewanella piezotolerans (strain WP3)                            | Proteobacteria |
| A4YBU5 | <b>CINAL SHEPC</b>  | Shewanella putrefaciens                                          | Proteobacteria |
| A8G1B1 | <b>CINAL SHESH</b>  | Shewanella sediminis (strain HAW-EB3)                            | Proteobacteria |
| B1KNC9 | <b>CINAL SHEWM</b>  | Shewanella woodyi (strain ATCC 51908)                            | Proteobacteria |
| Q31X65 | <b>Q31X65 SHIBS</b> | Shigella boydii serotype 4 (strain Sb227)                        | Proteobacteria |
| I6FM95 | <b>I6FM95 SHIDY</b> | Shigella dysenteriae 225-75                                      | Proteobacteria |
| F6DY83 | <b>F6DY83 SINMK</b> | Sinorhizobium meliloti (strain AK83)                             | Proteobacteria |
| A9FML0 | <b>CINAL SORC5</b>  | Sorangium cellulosum (strain So ce56)                            | Proteobacteria |
| A0LLA6 | <b>CINAL SYNFM</b>  | Syntrophobacter fumaroxidans (strain DSM 10017)                  | Proteobacteria |
| Q2LPL3 | <b>CINAL SYNAS</b>  | Syntrophus aciditrophicus (strain SB)                            | Proteobacteria |
| I3Y732 | <b>I3Y732 THIV6</b> | Thiocystis violascens (strain ATCC 17096)                        | Proteobacteria |
| G2E2V4 | <b>G2E2V4 9GAMM</b> | Thiorhodococcus drewsii AZ1                                      | Proteobacteria |
| J1N2F8 | <b>J1N2F8 VIBCL</b> | Vibrio cholerae HE-25                                            | Proteobacteria |
| A9ZXU7 | <b>A9ZXU7 YERPE</b> | Yersinia pestis biovar Orientalis str. F1991016                  | Proteobacteria |
| Q5NNF6 | <b>Q5NNF6 ZYMMO</b> | Zymomonas mobilis subsp. mobilis (strain ATCC 31821)             | Proteobacteria |
| C8WFR3 | <b>C8WFR3 ZYMMN</b> | Zymomonas mobilis subsp. mobilis (strain NCIB 11163)             | Proteobacteria |
| B0SB28 | <b>CINAL LEPBA</b>  | Leptospira biflexa serovar Patoc (strain Patoc 1)                | Spirochaetes   |
| Q04TG1 | <b>CINAL LEPBJ</b>  | Leptospira borgpetersenii serovar Hardjo-ovis (strain JB197)     | Spirochaetes   |
| Q8F5J2 | <b>CINAL LEPIN</b>  | Leptospira interrogans serogr Icterohaemorrhagiae (strain 56601) | Spirochaetes   |
| P47361 | <b>Y115 MYCGE</b>   | Mycoplasma genitalium (strain ATCC 33530)                        | Tenericutes    |
| Q9EXC9 | <b>Y254 MYCPN</b>   | Mycoplasma pneumoniae (strain ATCC 29342)                        | Tenericutes    |
| A7HNE6 | <b>CINAL FERNB</b>  | Fervidobacterium nodosum (strain ATCC 35602)                     | Thermotogae    |
| C5CFW1 | <b>CINAL KOSOT</b>  | Kosmotoga olearia (strain TBF 19.5.1)                            | Thermotogae    |
| A9BHX8 | <b>CINAL PETMO</b>  | Petrotoga mobilis (strain DSM 10674)                             | Thermotogae    |

|        |                    |                                                      |                 |
|--------|--------------------|------------------------------------------------------|-----------------|
| A6LL44 | <b>CINAL THEM4</b> | <i>Thermosipho melanesiensis</i> (strain BI429)      | Thermotogae     |
| A8F4W4 | <b>CINAL THELT</b> | <i>Thermotoga lettingae</i> (strain ATCC BAA-301)    | Thermotogae     |
| Q9S5X1 | <b>CINAL THEMA</b> | <i>Thermotoga maritima</i> (strain ATCC 43589)       | Thermotogae     |
| B9KAS5 | <b>CINAL THENN</b> | <i>Thermotoga neapolitana</i> (strain ATCC 49049)    | Thermotogae     |
| B2UNF6 | <b>CINAL AKKM8</b> | <i>Akkermansia muciniphila</i> (strain ATCC BAA-835) | Verrucomicrobia |
